# Supplementary material
Source: PubMed Central journal article supplement (PMC9873268)
Supplement: mmc1.pdf [file mmc1.pdf]

# THE LANCET

## Diabetes & Endocrinology

### Supplementary appendix

This appendix formed part of the original submission and has been peer reviewed.  
We post it as supplied by the authors.

Supplement to: Xu E, Xie Y, Al-Aly Z. Risks and burdens of incident dyslipidaemia  
in long COVID: a cohort study. *Lancet Diabetes Endocrinol* 2023; published online Jan 6.  
[https://doi.org/10.1016/S2213-8587\(22\)00355-2](https://doi.org/10.1016/S2213-8587(22)00355-2).

## Risks and burdens of incident dyslipidemia in long COVID: a cohort study

| Table of Contents                                                                                                                                                 | Page  |
|-------------------------------------------------------------------------------------------------------------------------------------------------------------------|-------|
| <b>APPENDIX FIGURES</b>                                                                                                                                           |       |
| Appendix Figure 1. Cohort construction flow chart                                                                                                                 | 3     |
| Appendix Figure 2. Standardized mean difference of predefined and algorithmically selected covariates                                                             | 4     |
| Appendix Figure 3. Risks and 12-month burdens of post-acute COVID-19 dyslipidemia outcomes compared to the historical control                                     | 5     |
| Appendix Figure 4. Subgroup analyses of the risks of incident post-acute COVID-19 dyslipidemia outcomes compared to the historical control                        | 6     |
| Appendix Figure 5. Risks and 12-month burdens of post-acute COVID-19 dyslipidemia outcomes by severity of the acute infection compared to the historical control  | 7     |
| <b>APPENDIX TABLES</b>                                                                                                                                            |       |
| Appendix Table 1. Demographic and health characteristics of COVID-19, contemporary and historical cohorts before weighting                                        | 8-9   |
| Appendix Table 2. Demographic and health characteristics of COVID-19, contemporary and historical cohorts after weighting                                         | 10-11 |
| Appendix Table 3. Risks and 12-month burdens of post-acute COVID-19 dyslipidemia outcomes compared to contemporary control                                        | 12    |
| Appendix Table 4. Risks and 12-month burdens of post-acute COVID-19 abnormal lipid lab and BMI increased outcomes compared to contemporary control                | 13    |
| Appendix Table 5. Subgroup analyses of the risks of incident post-acute COVID-19 composite dyslipidemia outcomes compared to contemporary control                 | 14-16 |
| Appendix Table 6. Demographic and health characteristics of the COVID-19 and contemporary cohorts by care setting of the acute infection before weighting         | 17-19 |
| Appendix Table 7. Demographic and health characteristics of the COVID-19 and contemporary cohorts by care setting of the acute infection after weighting          | 20-22 |
| Appendix Table 8. Risks and 12-month burdens of post-acute COVID-19 dyslipidemia outcomes by care setting of the acute infection compared to contemporary control | 23-25 |
| Appendix Table 9. Demographic and health characteristics of the COVID-19 and historical cohorts by care setting of the acute infection before weighting           | 26-27 |
| Appendix Table 10. Demographic and health characteristics of the COVID-19 and historical cohorts by care setting of the acute infection after weighting           | 28-30 |
| Appendix Table 11. Risks and 12-month burdens of post-acute COVID-19 dyslipidemia outcomes compared to historical control                                         | 31    |
| Appendix Table 12. Risks and 12-month burdens of post-acute COVID-19 abnormal lipid lab and BMI increased outcomes compared to historical control                 | 32    |

|                                                                                                                                                                  |       |
|------------------------------------------------------------------------------------------------------------------------------------------------------------------|-------|
| Appendix Table 13. Subgroup analyses of the risks of incident post-acute COVID-19 composite dyslipidemia outcomes compared to historical control                 | 33-35 |
| Appendix Table 14. Risks and 12-month burdens of post-acute COVID-19 dyslipidemia outcomes by care setting of the acute infection compared to historical control | 36-37 |
| Appendix Table 15. Sensitivity analysis for any dyslipidemia outcome compared to contemporary and historical controls                                            | 38    |
| Appendix Table 16. Sensitivity analysis for any dyslipidemia outcome by care setting of the acute infection compared to contemporary and historical controls     | 39    |

Appendix figure 1. Cohort construction flow chart

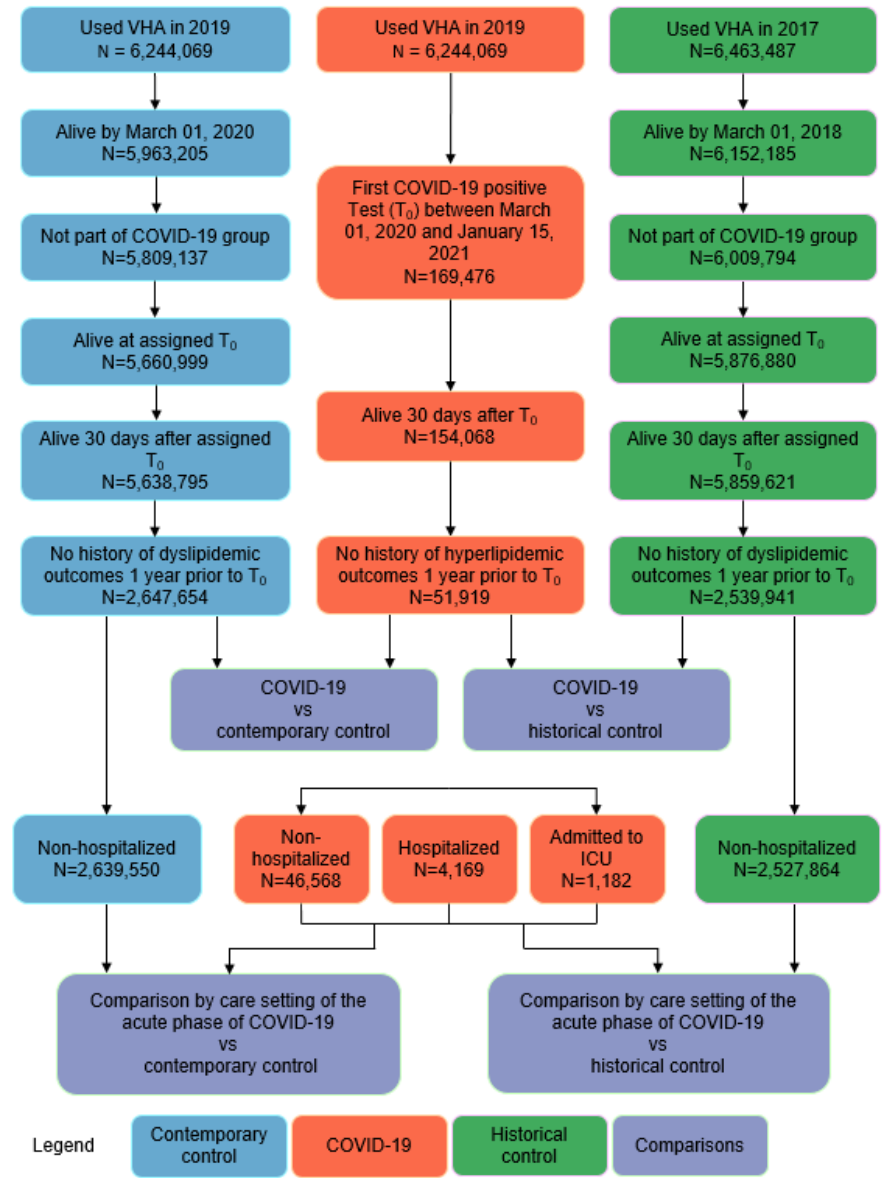

**Appendix figure 2. Standardized mean difference of predefined and algorithmically selected covariates.** (a) between COVID-19 and contemporary control; (b) by care setting of the acute infection between COVID-19 and contemporary control; (c) between COVID-19 and historical control; (d) by care setting of the acute infection between COVID-19 and historical control.

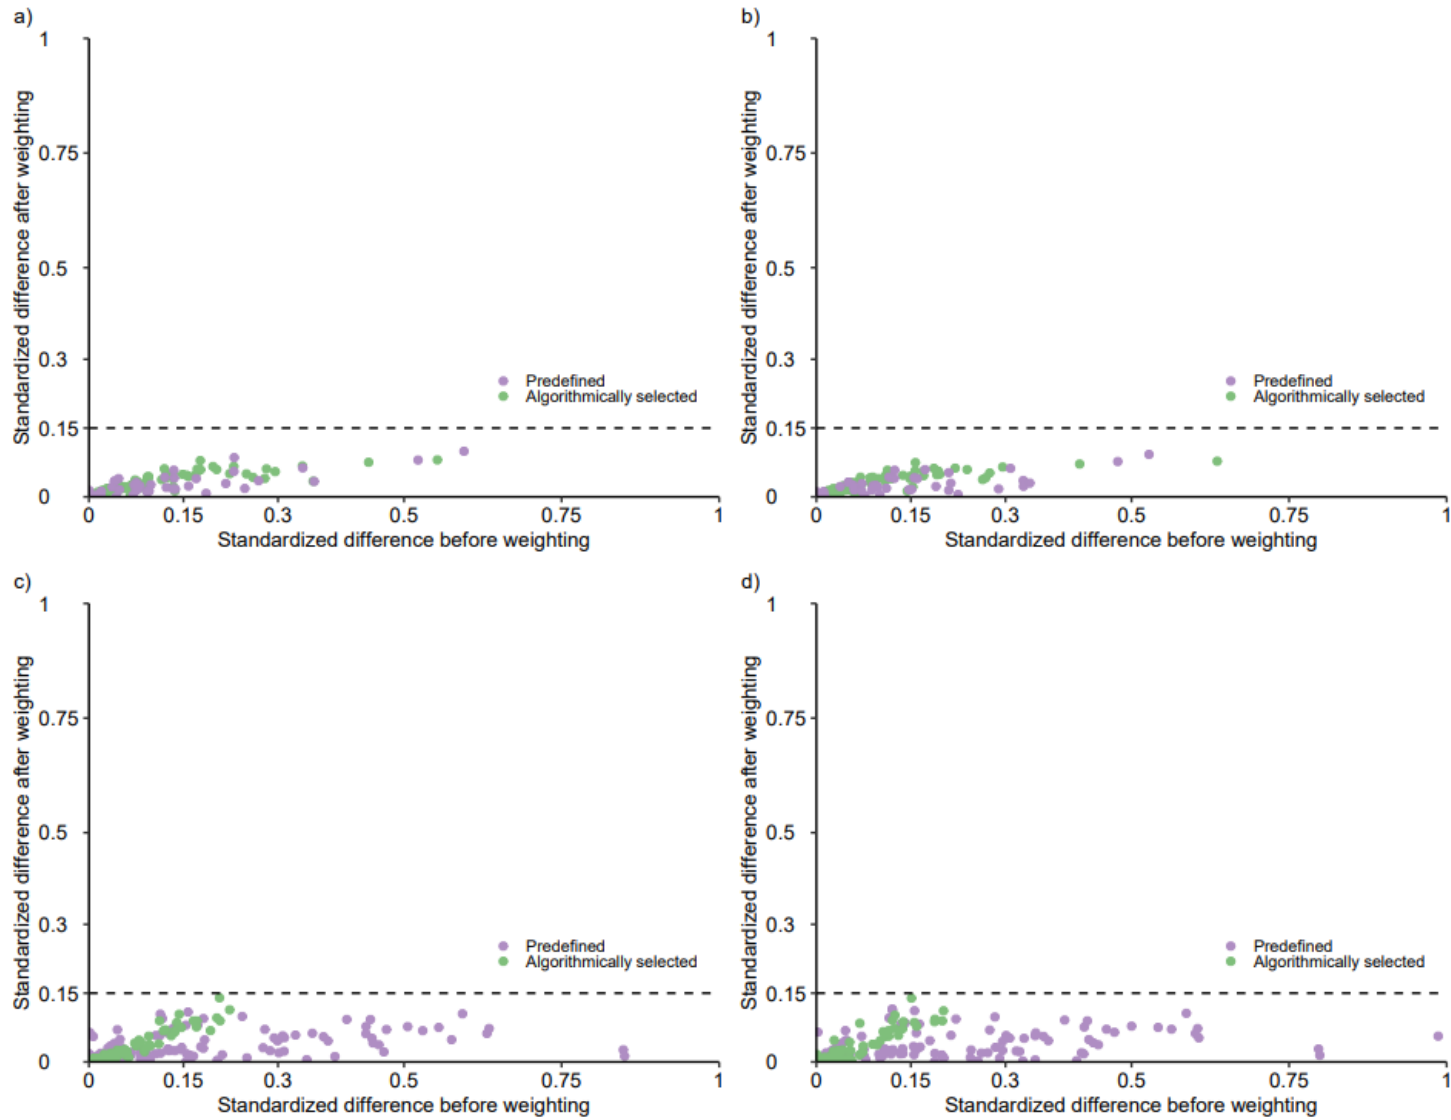

**Appendix Figure 3. Risks and 12-month burdens of post-acute COVID-19 dyslipidemia outcomes compared to the historical control.** Outcomes were ascertained 30 d after the COVID-19-positive test until the end of follow-up. COVID-19 cohort ( $n = 51,919$ ) and historical control cohort ( $n = 2,539,941$ ). Adjusted HRs and 95% CIs are presented. The length of the bar represents the excess burden per 1,000 persons at 1-year and associated 95% CIs are also shown. CI, confidence interval; LDL, low-density lipoprotein; HDL, high-density lipoprotein.

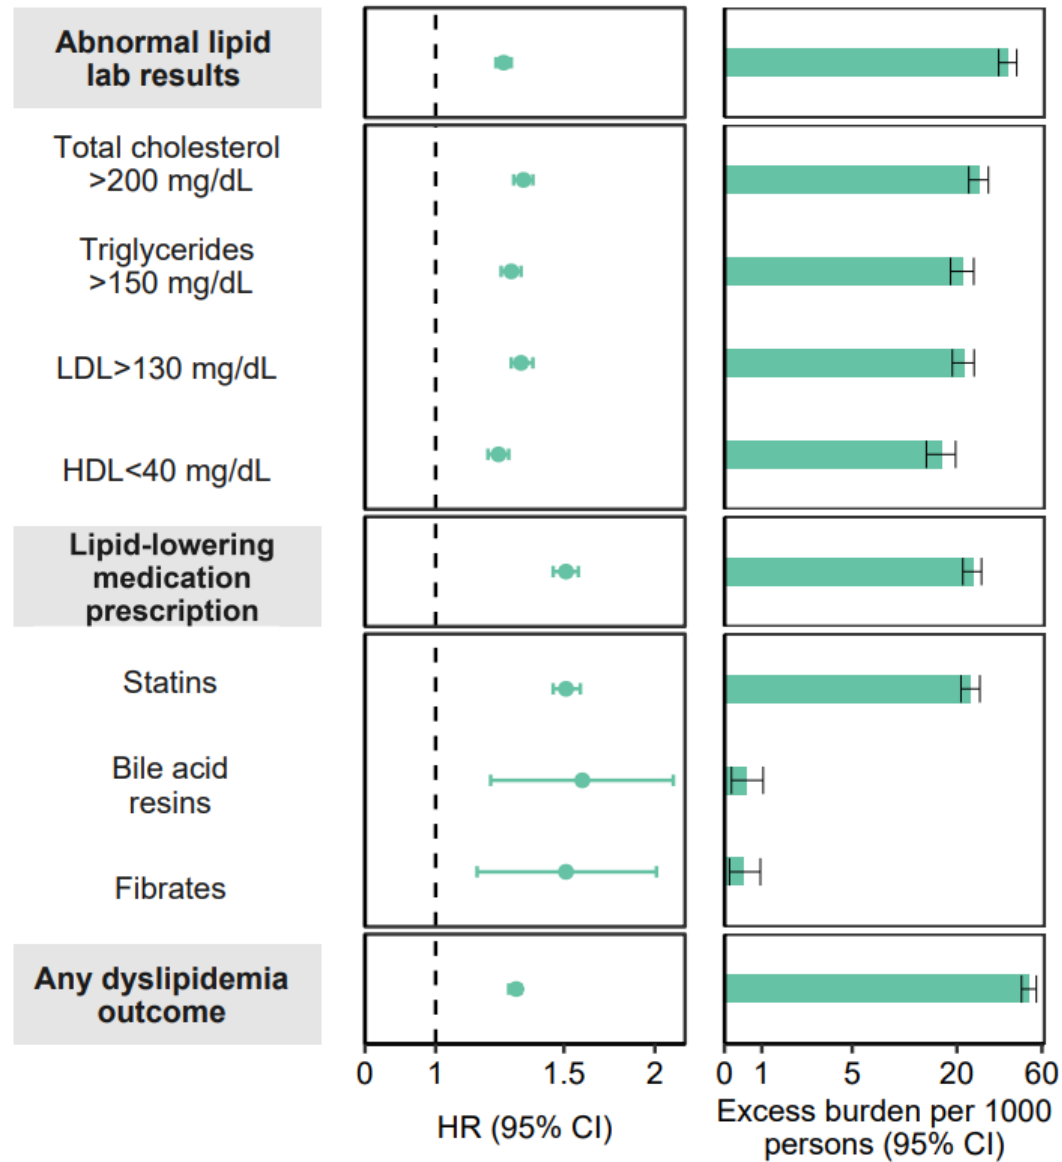

**Appendix Figure 4. Subgroup analyses of the risks of incident post-acute COVID-19 dyslipidemia outcomes compared to the historical control.**

Composite outcomes consisted of lipid lab abnormalities (total cholesterol>200mg/dL, triglycerides>150mg/dL, LDL>130mg/dL, and HDL<40mg/dL), lipid-lowering medication prescription (statins, bile acid resins, and fibrates), and any dyslipidemia outcome (incident occurrence of any dyslipidemia outcome studied). Outcomes were ascertained 30d after the COVID-19-positive test until the end of follow-up. COVID-19 cohort (*n* = 51,919) and historical control cohort (*n* = 2,539,941). Adjusted HRs and 95% CIs are presented. CI, confidence interval; LDL, low-density lipoprotein; HDL, high-density lipoprotein.

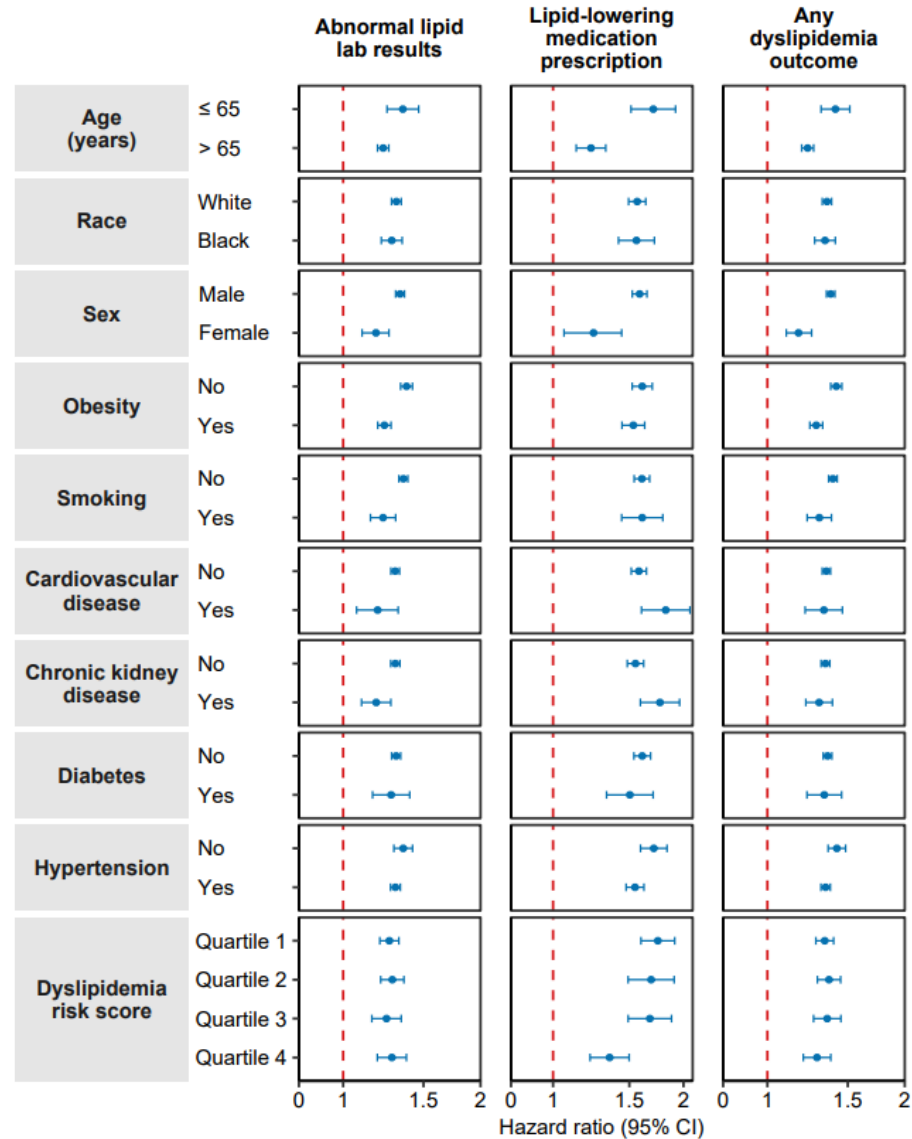

**Appendix figure 5. Risks and 12-month burdens of post-acute COVID-19 dyslipidemia outcomes by severity of the acute infection compared to the historical control.** Risks and burdens were assessed at 1-year in mutually exclusive groups comprising non-hospitalized individuals with COVID-19 (green), individuals hospitalized for COVID-19 (orange) and individuals admitted to intensive care for COVID-19 during the acute phase (first 30 d) of COVID-19 (blue). Outcomes were ascertained 30 d after the COVID-19-positive test until the end of follow-up. The contemporary control cohort served as the referent category. Within the COVID-19 cohort, non-hospitalized ( $n = 46,568$ ), hospitalized ( $n = 4,169$ ), admitted to intensive care ( $n = 1,182$ ) and historical control cohort ( $n = 2,539,941$ ). Adjusted HRs and 95% CIs are presented. The length of the bar represents the excess burden per 1,000 persons at 1-year and related 95% CIs were also presented. CI, confidence interval; LDL, low-density lipoprotein; HDL, high-density lipoprotein.

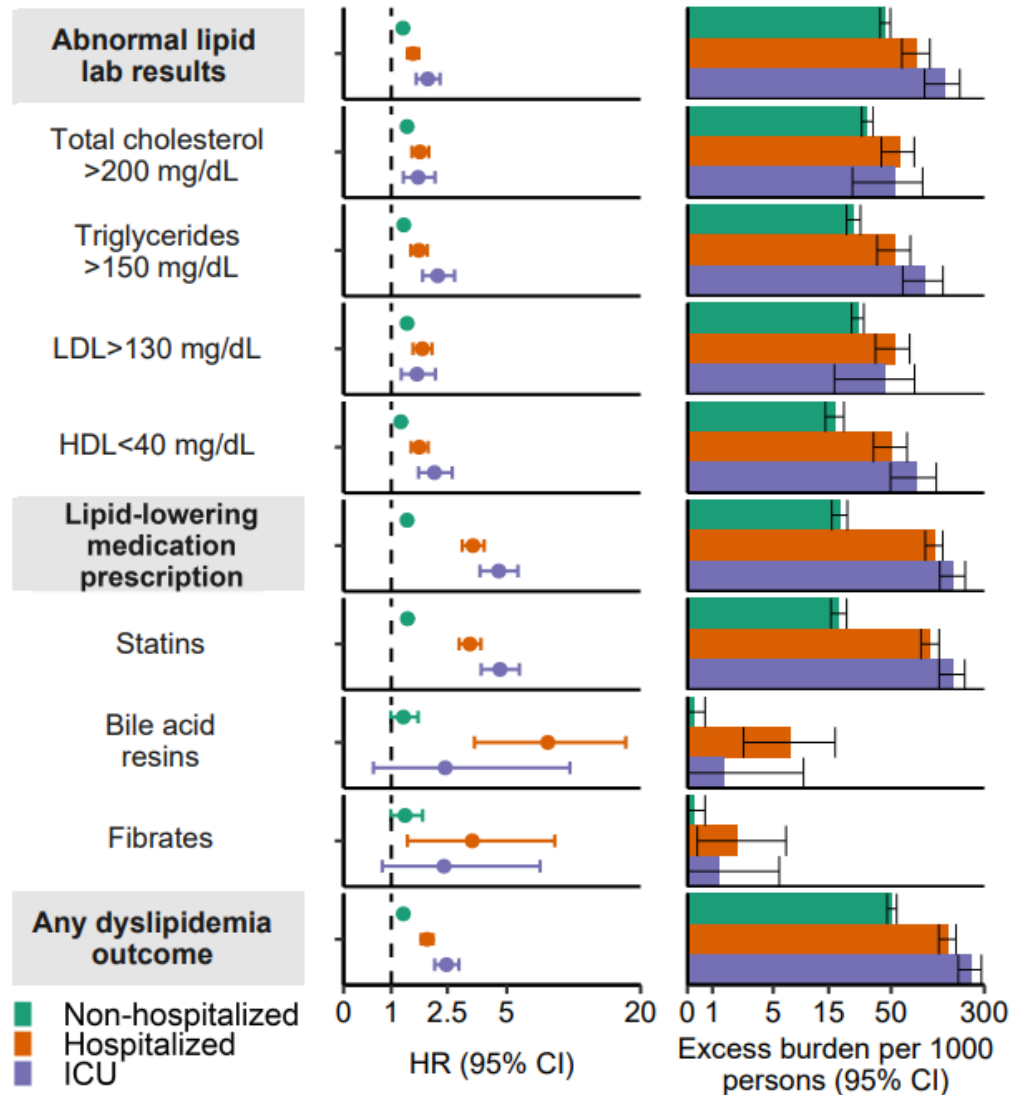



Appendix Table 1: Demographic and health characteristics of the COVID-19, contemporary control, and historical control groups before weighting

| Baseline Characteristics                              | COVID-19<br>(N=51,919) | Contemporary control<br>(N=2,647,654) | Historical control<br>(N=2,539,941) | Absolute standardized difference <sup>†</sup> |                                 |
|-------------------------------------------------------|------------------------|---------------------------------------|-------------------------------------|-----------------------------------------------|---------------------------------|
|                                                       |                        |                                       |                                     | COVID-19 and Contemporary control             | COVID-19 and Historical control |
| <b>Age, mean (std), yr</b>                            | 55.91 (17.66)          | 60.29 (18.26)                         | 59.82 (18.68)                       | 0.24                                          | 0.22                            |
| <b>Race, no. (%)</b>                                  |                        |                                       |                                     |                                               |                                 |
| White                                                 | 35,231 (67.86)         | 1,999,159 (75.51)                     | 1,921,731 (75.66)                   | 0.17                                          | 0.17                            |
| Black                                                 | 14,005 (26.97)         | 522,436 (19.73)                       | 496,416 (19.54)                     | 0.17                                          | 0.18                            |
| Other                                                 | 2,683 (5.17)           | 126,059 (4.76)                        | 121,794 (4.80)                      | 0.02                                          | 0.02                            |
| <b>Sex, no. (%)</b>                                   |                        |                                       |                                     |                                               |                                 |
| Male                                                  | 42,858 (82.55)         | 2,311,433 (87.30)                     | 2,214,416 (87.18)                   | 0.13                                          | 0.13                            |
| Female                                                | 9,061 (17.45)          | 336,221 (12.70)                       | 325,525 (12.82)                     | 0.13                                          | 0.13                            |
| <b>BMI category, no. (%), kg/m<sup>2</sup></b>        |                        |                                       |                                     |                                               |                                 |
| Underweight/Normal                                    | 9,977 (19.22)          | 602,006 (22.74)                       | 599,416 (23.60)                     | 0.09                                          | 0.11                            |
| Overweight                                            | 17,600 (33.90)         | 1,120,074 (42.30)                     | 1,129,388 (44.47)                   | 0.17                                          | 0.22                            |
| Obese                                                 | 24,342 (46.88)         | 925,574 (34.96)                       | 811,137 (31.94)                     | 0.24                                          | 0.31                            |
| <b>Smoking status, no. (%)</b>                        |                        |                                       |                                     |                                               |                                 |
| Never                                                 | 26,370 (50.79)         | 1,315,705 (49.69)                     | 1,543,775 (60.78)                   | 0.02                                          | 0.20                            |
| Former                                                | 16,619 (32.01)         | 778,420 (29.40)                       | 478,615 (18.84)                     | 0.06                                          | 0.31                            |
| Current                                               | 8,930 (17.20)          | 553,529 (20.91)                       | 517,551 (20.38)                     | 0.09                                          | 0.08                            |
| <b>Area Deprivation Index<sup>‡</sup>, mean (std)</b> | 52.99 (18.61)          | 52.65 (19.15)                         | 52.39 (19.26)                       | 0.02                                          | 0.03                            |
| Clinical Characteristics                              |                        |                                       |                                     |                                               |                                 |
| <b>Outpatient encounter<sup>a</sup>, no. (%)</b>      |                        |                                       |                                     |                                               |                                 |
| Zero                                                  | 3,797 (7.31)           | 571,207 (21.57)                       | 537,355 (21.16)                     | 0.41                                          | 0.40                            |
| One                                                   | 14,614 (28.15)         | 1,107,202 (41.82)                     | 1,059,654 (41.72)                   | 0.29                                          | 0.29                            |
| Two or more                                           | 33,508 (64.54)         | 969,245 (36.61)                       | 942,932 (37.12)                     | 0.58                                          | 0.57                            |
| <b>Long-term care, no. (%)</b>                        | 2,258 (4.35)           | 10,026 (0.38)                         | 13,043 (0.51)                       | 0.26                                          | 0.25                            |
| <b>eGFR, mean (std), ml/min/1.73m<sup>2</sup></b>     | 84.24 (21.24)          | 82.47 (19.08)                         | 82.79 (18.27)                       | 0.09                                          | 0.07                            |

| Baseline Characteristics                                                                                                                                                                                                                                                                                                                                                                                                                                                                                                                | COVID-19<br>(N=51,919) | Contemporary control<br>(N=2,647,654) | Historical control<br>(N=2,539,941) | Absolute standardized difference <sup>†</sup> |                                 |
|-----------------------------------------------------------------------------------------------------------------------------------------------------------------------------------------------------------------------------------------------------------------------------------------------------------------------------------------------------------------------------------------------------------------------------------------------------------------------------------------------------------------------------------------|------------------------|---------------------------------------|-------------------------------------|-----------------------------------------------|---------------------------------|
|                                                                                                                                                                                                                                                                                                                                                                                                                                                                                                                                         |                        |                                       |                                     | COVID-19 and Contemporary control             | COVID-19 and Historical control |
| <b>Systolic blood pressure, mean (std), mmHg</b>                                                                                                                                                                                                                                                                                                                                                                                                                                                                                        | 130.52 (12.30)         | 131.35 (12.61)                        | 131.42 (12.76)                      | 0.07                                          | 0.07                            |
| <b>Diastolic blood pressure, mean (std), mmHg</b>                                                                                                                                                                                                                                                                                                                                                                                                                                                                                       | 78.51 (7.70)           | 77.82 (7.65)                          | 77.53 (7.91)                        | 0.09                                          | 0.13                            |
| <b>Comorbidities</b>                                                                                                                                                                                                                                                                                                                                                                                                                                                                                                                    |                        |                                       |                                     |                                               |                                 |
| <b>Cancer, no. (%)</b>                                                                                                                                                                                                                                                                                                                                                                                                                                                                                                                  | 2,716 (5.23)           | 97,733 (3.69)                         | 90,270 (3.55)                       | 0.07                                          | 0.08                            |
| <b>Cardiovascular disease, no. (%)</b>                                                                                                                                                                                                                                                                                                                                                                                                                                                                                                  | 3,025 (5.83)           | 126,843 (4.79)                        | 123,262 (4.85)                      | 0.05                                          | 0.04                            |
| <b>Cerebrovascular disease, no. (%)</b>                                                                                                                                                                                                                                                                                                                                                                                                                                                                                                 | 956 (1.84)             | 23,931 (0.90)                         | 23,869 (0.94)                       | 0.08                                          | 0.08                            |
| <b>Chronic kidney disease, no. (%)</b>                                                                                                                                                                                                                                                                                                                                                                                                                                                                                                  | 5,724 (11.02)          | 278,115 (10.50)                       | 229,314 (9.03)                      | 0.02                                          | 0.07                            |
| <b>Chronic lung disease, no. (%)</b>                                                                                                                                                                                                                                                                                                                                                                                                                                                                                                    | 5,326 (10.26)          | 170,081 (6.42)                        | 165,960 (6.53)                      | 0.14                                          | 0.13                            |
| <b>Diabetes mellitus type 2, no. (%)</b>                                                                                                                                                                                                                                                                                                                                                                                                                                                                                                | 5,889 (11.34)          | 222,386 (8.40)                        | 211,180 (8.31)                      | 0.10                                          | 0.10                            |
| <b>Hypertension, no. (%)</b>                                                                                                                                                                                                                                                                                                                                                                                                                                                                                                            | 11,361 (21.88)         | 587,482 (22.19)                       | 541,950 (21.34)                     | 0.01                                          | 0.01                            |
| <b>Prescription medications</b>                                                                                                                                                                                                                                                                                                                                                                                                                                                                                                         |                        |                                       |                                     |                                               |                                 |
| <b>Anti-epileptics, no. (%)</b>                                                                                                                                                                                                                                                                                                                                                                                                                                                                                                         | 183 (0.35)             | 5,927 (0.22)                          | 6,043 (0.24)                        | 0.02                                          | 0.02                            |
| <b>Anti-psychotics, no. (%)</b>                                                                                                                                                                                                                                                                                                                                                                                                                                                                                                         | 2,517 (4.85)           | 80,613 (3.04)                         | 72,313 (2.85)                       | 0.09                                          | 0.10                            |
| <b>β-blockers, no. (%)</b>                                                                                                                                                                                                                                                                                                                                                                                                                                                                                                              | 4,546 (8.76)           | 154,764 (5.85)                        | 141,405 (5.57)                      | 0.11                                          | 0.12                            |
| <b>Corticosteroids, no. (%)</b>                                                                                                                                                                                                                                                                                                                                                                                                                                                                                                         | 879 (1.69)             | 25,190 (0.95)                         | 26,937 (1.06)                       | 0.06                                          | 0.05                            |
| <b>Diuretics, no. (%)</b>                                                                                                                                                                                                                                                                                                                                                                                                                                                                                                               | 5,742 (11.06)          | 175,890 (6.64)                        | 166,772 (6.57)                      | 0.16                                          | 0.16                            |
| <b>HIV protease inhibitors, no. (%)</b>                                                                                                                                                                                                                                                                                                                                                                                                                                                                                                 | 42 (0.08)              | 938 (0.04)                            | 1,307 (0.05)                        | 0.02                                          | 0.01                            |
| <b>Immunosuppressants, no. (%)</b>                                                                                                                                                                                                                                                                                                                                                                                                                                                                                                      | 462 (0.89)             | 13,417 (0.51)                         | 10,686 (0.42)                       | 0.05                                          | 0.06                            |
| <b>Hormone therapeutics, no. (%)</b>                                                                                                                                                                                                                                                                                                                                                                                                                                                                                                    | 1,467 (2.83)           | 36,950 (1.40)                         | 34,244 (1.35)                       | 0.10                                          | 0.10                            |
| <b>SGLT-2 inhibitors, no. (%)</b>                                                                                                                                                                                                                                                                                                                                                                                                                                                                                                       | 178 (0.34)             | 5,276 (0.20)                          | 1,087 (0.04)                        | 0.03                                          | 0.07                            |
| <sup>†</sup> . Standardized difference less than 0.15 is considered good balance.<br><sup>‡</sup> . Area Deprivation Index is a measure of socioeconomic disadvantage, with a range from low to high disadvantage of 0 to 100.<br><sup>a</sup> . Data collected within one year of cohort enrollment.<br><sup>b</sup> . Nursing homes and assisted-living centers.<br>std, standard deviation; BMI, body mass index; eGFR, estimated glomerular filtration rate; HIV, Human immunodeficiency virus; SGLT, sodium glucose cotransporter. |                        |                                       |                                     |                                               |                                 |

Appendix Table 2. Demographic and health characteristics of COVID-19, contemporary and historical cohorts after weighting

| Baseline Characteristics                              | COVID-19<br>(N=51,919) | Contemporary control<br>(N=2,647,654) | Historical control<br>(N=2,539,941) | Absolute standardized difference <sup>†</sup> |                                 |
|-------------------------------------------------------|------------------------|---------------------------------------|-------------------------------------|-----------------------------------------------|---------------------------------|
|                                                       |                        |                                       |                                     | COVID-19 and Contemporary control             | COVID-19 and Historical control |
| <b>Age, mean (std), yr</b>                            | 60.19 (18.28)          | 60.2 (18.26)                          | 60.16 (18.35)                       | 0.00                                          | 0.00                            |
| <b>Race, no. (%)</b>                                  |                        |                                       |                                     |                                               |                                 |
| White                                                 | 38476 (74.11)          | 1995325 (75.36)                       | 1912728 (75.31)                     | 0.03                                          | 0.03                            |
| Black                                                 | 10970 (21.13)          | 526062 (19.87)                        | 505651 (19.91)                      | 0.03                                          | 0.03                            |
| Other                                                 | 2473 (4.76)            | 126267 (4.77)                         | 121587 (4.79)                       | 0.00                                          | 0.00                            |
| <b>Sex, no. (%)</b>                                   |                        |                                       |                                     |                                               |                                 |
| Male                                                  | 44471 (85.65)          | 2309019 (87.21)                       | 2213838 (87.16)                     | 0.05                                          | 0.04                            |
| Female                                                | 7448 (14.35)           | 338635 (12.79)                        | 326103 (12.84)                      | 0.05                                          | 0.04                            |
| <b>BMI category, no. (%), kg/m<sup>2</sup></b>        |                        |                                       |                                     |                                               |                                 |
| Underweight/Normal                                    | 12397 (23.88)          | 600488 (22.68)                        | 578522 (22.78)                      | 0.03                                          | 0.03                            |
| Overweight                                            | 18933 (36.47)          | 1116569 (42.17)                       | 1081075 (42.56)                     | 0.12                                          | 0.12                            |
| Obese                                                 | 20590 (39.66)          | 930597 (35.15)                        | 880344 (34.66)                      | 0.09                                          | 0.10                            |
| <b>Smoking status, no. (%)</b>                        |                        |                                       |                                     |                                               |                                 |
| Never                                                 | 24132 (46.48)          | 1316149 (49.71)                       | 1261132 (49.65)                     | 0.06                                          | 0.06                            |
| Former                                                | 16258 (31.32)          | 779761 (29.45)                        | 747962 (29.45)                      | 0.04                                          | 0.04                            |
| Current                                               | 11528 (22.2)           | 551745 (20.84)                        | 530848 (20.9)                       | 0.03                                          | 0.03                            |
| <b>Area Deprivation Index<sup>‡</sup>, mean (std)</b> | 53.15 (19.11)          | 52.66 (19.14)                         | 52.65 (19.14)                       | 0.03                                          | 0.03                            |
| Clinical Characteristics                              |                        |                                       |                                     |                                               |                                 |
| <b>Outpatient encounter<sup>a</sup>, no. (%)</b>      |                        |                                       |                                     |                                               |                                 |
| Zero                                                  | 9951 (19.17)           | 563977 (21.3)                         | 535394 (21.08)                      | 0.05                                          | 0.05                            |
| One                                                   | 19294 (37.16)          | 1100021 (41.55)                       | 1055828 (41.57)                     | 0.09                                          | 0.09                            |
| Two or more                                           | 22675 (43.67)          | 983683 (37.15)                        | 948719 (37.35)                      | 0.13                                          | 0.13                            |
| <b>Long-term care, no. (%)</b>                        | 442 (0.85)             | 12047 (0.46)                          | 12192 (0.48)                        | 0.05                                          | 0.05                            |
| <b>eGFR, mean (std), ml/min/1.73m<sup>2</sup></b>     | 82.51 (19.94)          | 82.51 (19.12)                         | 82.58 (19.39)                       | 0.00                                          | 0.00                            |

| Baseline Characteristics                                                                                                                                                                                                                                                                                                                                                                                                                                                                                                                | COVID-19<br>(N=51,919) | Contemporary control<br>(N=2,647,654) | Historical control<br>(N=2,539,941) | Absolute standardized difference <sup>†</sup> |                                 |
|-----------------------------------------------------------------------------------------------------------------------------------------------------------------------------------------------------------------------------------------------------------------------------------------------------------------------------------------------------------------------------------------------------------------------------------------------------------------------------------------------------------------------------------------|------------------------|---------------------------------------|-------------------------------------|-----------------------------------------------|---------------------------------|
|                                                                                                                                                                                                                                                                                                                                                                                                                                                                                                                                         |                        |                                       |                                     | COVID-19 and Contemporary control             | COVID-19 and Historical control |
| <b>Systolic blood pressure, mean (std), mmHg</b>                                                                                                                                                                                                                                                                                                                                                                                                                                                                                        | 131 (12.73)            | 131.33 (12.6)                         | 131.28 (12.71)                      | 0.03                                          | 0.02                            |
| <b>Diastolic blood pressure, mean (std), mmHg</b>                                                                                                                                                                                                                                                                                                                                                                                                                                                                                       | 77.67 (7.72)           | 77.83 (7.66)                          | 77.84 (7.72)                        | 0.02                                          | 0.02                            |
| <b>Diagnoses</b>                                                                                                                                                                                                                                                                                                                                                                                                                                                                                                                        |                        |                                       |                                     |                                               |                                 |
| <b>Cancer, no. (%)</b>                                                                                                                                                                                                                                                                                                                                                                                                                                                                                                                  | 2352 (4.53)            | 98546 (3.72)                          | 94816 (3.73)                        | 0.04                                          | 0.04                            |
| <b>Cardiovascular disease, no. (%)</b>                                                                                                                                                                                                                                                                                                                                                                                                                                                                                                  | 2852 (5.49)            | 127379 (4.81)                         | 122679 (4.83)                       | 0.03                                          | 0.03                            |
| <b>Cerebrovascular disease, no. (%)</b>                                                                                                                                                                                                                                                                                                                                                                                                                                                                                                 | 608 (1.17)             | 24411 (0.92)                          | 23647 (0.93)                        | 0.02                                          | 0.02                            |
| <b>Chronic kidney disease, no. (%)</b>                                                                                                                                                                                                                                                                                                                                                                                                                                                                                                  | 6035 (11.62)           | 278374 (10.51)                        | 267126 (10.52)                      | 0.04                                          | 0.04                            |
| <b>Chronic lung disease, no. (%)</b>                                                                                                                                                                                                                                                                                                                                                                                                                                                                                                    | 4464 (8.6)             | 172098 (6.5)                          | 165960 (6.53)                       | 0.08                                          | 0.08                            |
| <b>Diabetes mellitus type 2, no. (%)</b>                                                                                                                                                                                                                                                                                                                                                                                                                                                                                                | 4919 (9.47)            | 223886 (8.46)                         | 214981 (8.46)                       | 0.04                                          | 0.04                            |
| <b>Hypertension, no. (%)</b>                                                                                                                                                                                                                                                                                                                                                                                                                                                                                                            | 11620 (22.38)          | 587329 (22.18)                        | 564654 (22.23)                      | 0.00                                          | 0.00                            |
| <b>Prescription medications</b>                                                                                                                                                                                                                                                                                                                                                                                                                                                                                                         |                        |                                       |                                     |                                               |                                 |
| <b>Anti-epileptics, no. (%)</b>                                                                                                                                                                                                                                                                                                                                                                                                                                                                                                         | 159 (0.31)             | 5984 (0.23)                           | 5867 (0.23)                         | 0.02                                          | 0.01                            |
| <b>Anti-psychotics, no. (%)</b>                                                                                                                                                                                                                                                                                                                                                                                                                                                                                                         | 2063 (3.97)            | 81548 (3.08)                          | 79322 (3.12)                        | 0.05                                          | 0.05                            |
| <b>β-blockers, no. (%)</b>                                                                                                                                                                                                                                                                                                                                                                                                                                                                                                              | 3793 (7.31)            | 156265 (5.9)                          | 151812 (5.98)                       | 0.06                                          | 0.05                            |
| <b>Corticosteroids, no. (%)</b>                                                                                                                                                                                                                                                                                                                                                                                                                                                                                                         | 658 (1.27)             | 25576 (0.97)                          | 24612 (0.97)                        | 0.03                                          | 0.03                            |
| <b>Diuretics, no. (%)</b>                                                                                                                                                                                                                                                                                                                                                                                                                                                                                                               | 4323 (8.33)            | 178161 (6.73)                         | 172614 (6.8)                        | 0.06                                          | 0.06                            |
| <b>HIV protease inhibitors, no. (%)</b>                                                                                                                                                                                                                                                                                                                                                                                                                                                                                                 | 30 (0.06)              | 953 (0.04)                            | 940 (0.04)                          | 0.01                                          | 0.01                            |
| <b>Immunosuppressants, no. (%)</b>                                                                                                                                                                                                                                                                                                                                                                                                                                                                                                      | 339 (0.65)             | 13609 (0.51)                          | 13157 (0.52)                        | 0.02                                          | 0.02                            |
| <b>Hormone therapeutics, no. (%)</b>                                                                                                                                                                                                                                                                                                                                                                                                                                                                                                    | 904 (1.74)             | 37676 (1.42)                          | 37261 (1.47)                        | 0.03                                          | 0.02                            |
| <b>SGLT-2 inhibitors, no. (%)</b>                                                                                                                                                                                                                                                                                                                                                                                                                                                                                                       | 128 (0.25)             | 5348 (0.2)                            | 5004 (0.2)                          | 0.01                                          | 0.01                            |
| <sup>†</sup> . Standardized difference less than 0.15 is considered good balance.<br><sup>‡</sup> . Area Deprivation Index is a measure of socioeconomic disadvantage, with a range from low to high disadvantage of 0 to 100.<br><sup>a</sup> . Data collected within one year of cohort enrollment.<br><sup>b</sup> . Nursing homes and assisted-living centers.<br>std, standard deviation; BMI, body mass index; eGFR, estimated glomerular filtration rate; HIV, Human immunodeficiency virus; SGLT, sodium glucose cotransporter. |                        |                                       |                                     |                                               |                                 |

**Appendix Table 3. Risks and 12-month burdens of post-acute COVID-19 dyslipidemia outcomes compared to contemporary control**

| Outcome*                                                                                                                                                                                                                                                                                                                                                                                                                            | Hazard Ratio (95% CI)†           | COVID-19 burden per 1000 persons at 12 months (95% CI)† | Contemporary control burden per 1000 persons at 12 months (95% CI)† | Absolute burden difference per 1000 persons at 12 months (95% CI)† |
|-------------------------------------------------------------------------------------------------------------------------------------------------------------------------------------------------------------------------------------------------------------------------------------------------------------------------------------------------------------------------------------------------------------------------------------|----------------------------------|---------------------------------------------------------|---------------------------------------------------------------------|--------------------------------------------------------------------|
|                                                                                                                                                                                                                                                                                                                                                                                                                                     | COVID-19 vs Contemporary control |                                                         |                                                                     |                                                                    |
| <b>Abnormal lipid lab results</b>                                                                                                                                                                                                                                                                                                                                                                                                   | 1.24 (1.21, 1.27)                | 223.20 (218.72, 227.75)                                 | 184.01 (183.56, 184.46)                                             | 39.19 (34.71, 43.73)                                               |
| Total cholesterol>200 mg/dL                                                                                                                                                                                                                                                                                                                                                                                                         | 1.26 (1.22, 1.29)                | 116.03 (112.72, 119.44)                                 | 93.57 (93.24, 93.91)                                                | 22.46 (19.14, 25.87)                                               |
| Triglycerides>150 mg/dL                                                                                                                                                                                                                                                                                                                                                                                                             | 1.27 (1.23, 1.31)                | 107.83 (104.65, 111.10)                                 | 85.80 (85.48, 86.12)                                                | 22.03 (18.85, 25.30)                                               |
| LDL>130 mg/dL                                                                                                                                                                                                                                                                                                                                                                                                                       | 1.24 (1.20, 1.29)                | 95.94 (92.92, 99.05)                                    | 77.94 (77.63, 78.25)                                                | 18.00 (14.98, 21.11)                                               |
| HDL<40 mg/dL                                                                                                                                                                                                                                                                                                                                                                                                                        | 1.20 (1.16, 1.25)                | 96.01 (92.95, 99.16)                                    | 80.42 (80.11, 80.74)                                                | 15.58 (12.52, 18.73)                                               |
| <b>Lipid-lowering medication prescription</b>                                                                                                                                                                                                                                                                                                                                                                                       | 1.54 (1.48, 1.61)                | 74.37 (71.48, 77.36)                                    | 48.87 (48.62, 49.12)                                                | 25.50 (22.61, 28.50)                                               |
| Statins                                                                                                                                                                                                                                                                                                                                                                                                                             | 1.55 (1.48, 1.61)                | 72.27 (69.41, 75.23)                                    | 47.32 (47.08, 47.57)                                                | 24.94 (22.09, 27.91)                                               |
| Bile acid resins                                                                                                                                                                                                                                                                                                                                                                                                                    | 1.48 (1.11, 1.97)                | 1.48 (1.11, 1.97)                                       | 1.00 (0.97, 1.04)                                                   | 0.48 (0.11, 0.97)                                                  |
| Fibrates                                                                                                                                                                                                                                                                                                                                                                                                                            | 1.53 (1.15, 2.02)                | 1.44 (1.08, 1.91)                                       | 0.94 (0.91, 0.98)                                                   | 0.50 (0.14, 0.96)                                                  |
| <b>Any dyslipidemia outcome</b>                                                                                                                                                                                                                                                                                                                                                                                                     | 1.31 (1.28, 1.34)                | 258.34 (253.53, 263.24)                                 | 204.32 (203.85, 204.78)                                             | 54.03 (49.21, 58.92)                                               |
| <p>*. Outcomes were ascertained from day 30 after the initial positive COVID-19 test result until end of follow up<br/> †. Adjustment through inverse probability weighting using predefined and algorithmically selected high-dimensional variables. Burdens were computed based on the estimated survival probability at 12 month.<br/> CI, confidence interval; LDL, low-density lipoprotein; HDL, high-density lipoprotein.</p> |                                  |                                                         |                                                                     |                                                                    |

**Appendix Table 4. Risks and 12-month burdens of post-acute COVID-19 abnormal lipid lab and BMI increased outcomes compared to contemporary control**

| Outcome*                 | Hazard Ratio (95% CI) <sup>†</sup> | COVID-19 burden per 1000 persons at 12 months (95% CI) <sup>†</sup> | Contemporary control burden per 1000 persons at 12 months (95% CI) <sup>†</sup> | Absolute burden difference per 1000 persons at 12 months (95% CI) <sup>†</sup> |
|--------------------------|------------------------------------|---------------------------------------------------------------------|---------------------------------------------------------------------------------|--------------------------------------------------------------------------------|
|                          | COVID-19 vs Contemporary control   |                                                                     |                                                                                 |                                                                                |
| <b>Total cholesterol</b> |                                    |                                                                     |                                                                                 |                                                                                |
| >210 mg/dL               | 1.25 (1.21, 1.3)                   | 82.99 (80.2, 85.87)                                                 | 66.71 (66.42, 66.99)                                                            | 16.28 (13.49, 19.16)                                                           |
| >220 mg/dL               | 1.25 (1.20, 1.31)                  | 59.16 (56.77, 61.64)                                                | 47.48 (47.24, 47.73)                                                            | 11.67 (9.28, 14.16)                                                            |
| >230 mg/dL               | 1.26 (1.19, 1.32)                  | 41.75 (39.74, 43.85)                                                | 33.37 (33.17, 33.58)                                                            | 8.37 (6.37, 10.48)                                                             |
| <b>Triglycerides</b>     |                                    |                                                                     |                                                                                 |                                                                                |
| >160 mg/dL               | 1.27 (1.23, 1.32)                  | 93.27 (90.34, 96.29)                                                | 73.94 (73.64, 74.24)                                                            | 19.33 (16.4, 22.35)                                                            |
| >170 mg/dL               | 1.28 (1.23, 1.32)                  | 81.71 (78.97, 84.55)                                                | 64.67 (64.39, 64.95)                                                            | 17.04 (14.3, 19.88)                                                            |
| >180 mg/dL               | 1.29 (1.24, 1.34)                  | 72.53 (69.93, 75.23)                                                | 56.73 (56.46, 56.99)                                                            | 15.81 (13.2, 18.51)                                                            |
| <b>LDL</b>               |                                    |                                                                     |                                                                                 |                                                                                |
| >140 mg/dL               | 1.24 (1.19, 1.29)                  | 64.29 (61.84, 66.84)                                                | 52.08 (51.83, 52.34)                                                            | 12.21 (9.76, 14.76)                                                            |
| >150 mg/dL               | 1.23 (1.17, 1.29)                  | 42.59 (40.59, 44.69)                                                | 34.73 (34.52, 34.94)                                                            | 7.86 (5.86, 9.96)                                                              |
| >160 mg/dL               | 1.22 (1.15, 1.30)                  | 27.77 (26.14, 29.51)                                                | 22.76 (22.59, 22.93)                                                            | 5.02 (3.38, 6.75)                                                              |
| <b>HDL</b>               |                                    |                                                                     |                                                                                 |                                                                                |
| <35 mg/dL                | 1.22 (1.16, 1.28)                  | 43.13 (41.08, 45.27)                                                | 35.5 (35.29, 35.71)                                                             | 7.63 (5.59, 9.77)                                                              |
| <30 mg/dL                | 1.14 (1.05, 1.24)                  | 13.13 (12.05, 14.31)                                                | 11.52 (11.4, 11.64)                                                             | 1.61 (0.53, 2.79)                                                              |
| <25 mg/dL                | 1.13 (0.94, 1.36)                  | 3.01 (2.50, 3.62)                                                   | 2.67 (2.61, 2.72)                                                               | 0.34 (-0.17, 0.95)                                                             |
| <b>BMI</b>               |                                    |                                                                     |                                                                                 |                                                                                |
| Increased >3%            | 1.16 (1.14, 1.19)                  | 354.12 (347.07, 361.26)                                             | 312.96 (312.08, 313.85)                                                         | 41.15 (34.11, 48.3)                                                            |
| Increased >5%            | 1.18 (1.14, 1.21)                  | 254.06 (247.72, 260.54)                                             | 220.65 (219.86, 221.44)                                                         | 33.41 (27.07, 39.89)                                                           |
| Increased >10%           | 1.14 (1.09, 1.19)                  | 115.48 (110.79, 120.34)                                             | 101.81 (101.25, 102.37)                                                         | 13.66 (8.98, 18.53)                                                            |

\*. Outcomes were ascertained from day 30 after the initial positive COVID-19 test result until end of follow up  
†. Adjustment through inverse probability weighting using predefined and algorithmically selected high-dimensional variables. Burdens were computed based on the estimated survival probability at 12 month.  
CI, confidence interval; LDL, low-density lipoprotein; HDL, high-density lipoprotein.

**Appendix Table 5. Subgroup analyses of the risks of incident post-acute COVID-19 composite dyslipidemia outcomes compared to contemporary control**

| Risk Factors   | Hazard ratio (95% CI) <sup>†</sup> - COVID-19 vs Contemporary control |                                        |                          |
|----------------|-----------------------------------------------------------------------|----------------------------------------|--------------------------|
|                | Abnormal lipid lab results                                            | Lipid-lowering medication prescription | Any dyslipidemia outcome |
| <b>Age</b>     |                                                                       |                                        |                          |
| ≤65            | 1.38<br>(1.29, 1.47)                                                  | 1.75<br>(1.59, 1.94)                   | 1.48<br>(1.39, 1.57)     |
| >65            | 1.26<br>(1.22, 1.29)                                                  | 1.30<br>(1.20, 1.40)                   | 1.28<br>(1.24, 1.31)     |
| <b>Race</b>    |                                                                       |                                        |                          |
| White          | 1.31<br>(1.28, 1.35)                                                  | 1.59<br>(1.52, 1.66)                   | 1.37<br>(1.34, 1.40)     |
| Black          | 1.27<br>(1.21, 1.34)                                                  | 1.56<br>(1.42, 1.72)                   | 1.36<br>(1.29, 1.43)     |
| <b>Sex</b>     |                                                                       |                                        |                          |
| Male           | 1.33<br>(1.30, 1.36)                                                  | 1.61<br>(1.55, 1.67)                   | 1.40<br>(1.37, 1.43)     |
| Female         | 1.15<br>(1.08, 1.23)                                                  | 1.17<br>(1.01, 1.36)                   | 1.16<br>(1.09, 1.24)     |
| <b>Obesity</b> |                                                                       |                                        |                          |
| No             | 1.38<br>(1.34, 1.42)                                                  | 1.63<br>(1.54, 1.72)                   | 1.44<br>(1.40, 1.48)     |
| Yes            | 1.22<br>(1.18, 1.26)                                                  | 1.54<br>(1.45, 1.64)                   | 1.29<br>(1.25, 1.33)     |
| <b>Smoking</b> |                                                                       |                                        |                          |
| No/former      | 1.31<br>(1.29, 1.35)                                                  | 1.62<br>(1.55, 1.69)                   | 1.37<br>(1.34, 1.40)     |
| Yes            | 1.25<br>(1.17, 1.33)                                                  | 1.55<br>(1.39, 1.73)                   | 1.33<br>(1.26, 1.42)     |

| Risk Factors                               | Hazard ratio (95% CI) <sup>†</sup> - COVID-19 vs Contemporary control |                                        |                      |
|--------------------------------------------|-----------------------------------------------------------------------|----------------------------------------|----------------------|
|                                            | Abnormal lipid lab results                                            | Lipid-lowering medication prescription | Coagulation studies  |
| <b>Cardiovascular disease</b>              |                                                                       |                                        |                      |
| No                                         | 1.30<br>(1.27, 1.32)                                                  | 1.59<br>(1.52, 1.65)                   | 1.36<br>(1.33, 1.39) |
| Yes                                        | 1.12<br>(1.01, 1.25)                                                  | 1.75<br>(1.54, 2.00)                   | 1.28<br>(1.17, 1.40) |
| <b>Chronic kidney disease</b>              |                                                                       |                                        |                      |
| No                                         | 1.31<br>(1.28, 1.34)                                                  | 1.57<br>(1.50, 1.64)                   | 1.36<br>(1.33, 1.39) |
| Yes                                        | 1.16<br>(1.07, 1.24)                                                  | 1.75<br>(1.57, 1.94)                   | 1.30<br>(1.21, 1.39) |
| <b>Diabetes</b>                            |                                                                       |                                        |                      |
| No                                         | 1.30<br>(1.27, 1.33)                                                  | 1.61<br>(1.54, 1.68)                   | 1.37<br>(1.34, 1.40) |
| Yes                                        | 1.21<br>(1.10, 1.33)                                                  | 1.57<br>(1.39, 1.77)                   | 1.32<br>(1.21, 1.44) |
| <b>Hypertension</b>                        |                                                                       |                                        |                      |
| No                                         | 1.33<br>(1.27, 1.40)                                                  | 1.65<br>(1.54, 1.78)                   | 1.41<br>(1.35, 1.48) |
| Yes                                        | 1.29<br>(1.26, 1.33)                                                  | 1.58<br>(1.50, 1.65)                   | 1.35<br>(1.32, 1.39) |
| <b>Dyslipidemia risk score<sup>§</sup></b> |                                                                       |                                        |                      |
| Quartile 1                                 | 1.27<br>(1.21, 1.33)                                                  | 1.74<br>(1.59, 1.90)                   | 1.36<br>(1.30, 1.42) |
| Quartile 2                                 | 1.26<br>(1.19, 1.34)                                                  | 1.68<br>(1.49, 1.89)                   | 1.37<br>(1.29, 1.45) |
| Quartile 3                                 | 1.23<br>(1.14, 1.32)                                                  | 1.64<br>(1.46, 1.84)                   | 1.35<br>(1.26, 1.44) |
| Quartile 4                                 | 1.26<br>(1.18, 1.36)                                                  | 1.37<br>(1.23, 1.52)                   | 1.30<br>(1.21, 1.39) |



\*. Adjustment through inverse probability weighting using predefined and algorithmically selected high-dimensional variables.

†. Obesity was defined based on baseline BMI>30kg/m<sup>2</sup>

‡. Chronic kidney disease was defined based on baseline outpatient estimated Glomerular Filtration Rate< 60 mL/min/1.73 m<sup>2</sup>

§. Dyslipidemia risk score as probability of having incident lipid-lowering medication use or abnormal lipid labs within 12 months based on age, race, sex, body mass index, cardiovascular disease, cerebrovascular disease, diabetes, and hypertension.

CI, confidence interval.

**Appendix Table 6. Demographic and health characteristics of the COVID-19 and contemporary cohorts by care setting of the acute infection before weighting**

| Baseline Characteristics                              | Non-hospitalized (N=46,568) | Hospitalized (N=4,169) | Admitted to intensive care (N=1,182) | Contemporary control (N=2,639,550) | Absolute standardized difference <sup>†</sup> |                                       |                                                     |
|-------------------------------------------------------|-----------------------------|------------------------|--------------------------------------|------------------------------------|-----------------------------------------------|---------------------------------------|-----------------------------------------------------|
|                                                       |                             |                        |                                      |                                    | Non-hospitalized and Contemporary control     | Hospitalized and Contemporary control | Admitted to intensive care and Contemporary control |
| <b>Age, mean (std), yr</b>                            | 54.76 (17.42)               | 65.61 (16.80)          | 66.93 (15.55)                        | 60.28 (18.27)                      | 0.31                                          | 0.30                                  | 0.39                                                |
| <b>Race, no. (%)</b>                                  |                             |                        |                                      |                                    |                                               |                                       |                                                     |
| White                                                 | 32,057 (68.84)              | 2,490 (59.73)          | 684 (57.87)                          | 1,993,654 (75.53)                  | 0.15                                          | 0.34                                  | 0.38                                                |
| Black                                                 | 12,137 (26.06)              | 1,443 (34.61)          | 425 (35.96)                          | 520,242 (19.71)                    | 0.15                                          | 0.34                                  | 0.37                                                |
| Other                                                 | 2,374 (5.10)                | 236 (5.66)             | 73 (6.18)                            | 125,654 (4.76)                     | 0.02                                          | 0.04                                  | 0.06                                                |
| <b>Sex, no. (%)</b>                                   |                             |                        |                                      |                                    |                                               |                                       |                                                     |
| Male                                                  | 37,988 (81.58)              | 3,785 (90.79)          | 1,085 (91.79)                        | 2,304,052 (87.29)                  | 0.16                                          | 0.11                                  | 0.15                                                |
| Female                                                | 8,580 (18.43)               | 384 (9.21)             | 97 (8.21)                            | 335,498 (12.71)                    | 0.16                                          | 0.11                                  | 0.15                                                |
| <b>BMI category, no. (%), kg/m<sup>2</sup></b>        |                             |                        |                                      |                                    |                                               |                                       |                                                     |
| Underweight/Normal                                    | 8,582 (18.43)               | 1,113 (26.70)          | 282 (23.86)                          | 599,167 (22.70)                    | 0.11                                          | 0.09                                  | 0.03                                                |
| Overweight                                            | 15,877 (34.09)              | 1,348 (32.33)          | 375 (31.73)                          | 1,117,303 (42.33)                  | 0.17                                          | 0.21                                  | 0.22                                                |
| Obese                                                 | 22,109 (47.48)              | 1,708 (40.97)          | 525 (44.42)                          | 923,080 (34.97)                    | 0.26                                          | 0.12                                  | 0.19                                                |
| <b>Smoking status, no. (%)</b>                        |                             |                        |                                      |                                    |                                               |                                       |                                                     |
| Never                                                 | 23,918 (51.36)              | 1,920 (46.05)          | 532 (45.01)                          | 1,313,271 (49.75)                  | 0.03                                          | 0.07                                  | 0.10                                                |
| Former                                                | 14,777 (31.73)              | 1,397 (33.51)          | 445 (37.65)                          | 776,088 (29.40)                    | 0.05                                          | 0.09                                  | 0.18                                                |
| Current                                               | 7,873 (16.91)               | 852 (20.44)            | 205 (17.34)                          | 550,191 (20.84)                    | 0.10                                          | 0.01                                  | 0.09                                                |
| <b>Area Deprivation Index<sup>‡</sup>, mean (std)</b> | 53.10 (18.60)               | 51.73 (18.64)          | 53.50 (18.86)                        | 52.66 (19.15)                      | 0.02                                          | 0.05                                  | 0.04                                                |
| <b>Clinical Characteristics</b>                       |                             |                        |                                      |                                    |                                               |                                       |                                                     |
| <b>Outpatient encounter<sup>a</sup>, no. (%)</b>      |                             |                        |                                      |                                    |                                               |                                       |                                                     |
| Zero                                                  | 3,564 (7.65)                | 174 (4.17)             | 59 (4.99)                            | 571,046 (21.63)                    | 0.40                                          | 0.54                                  | 0.51                                                |
| One                                                   | 13,746 (29.52)              | 687 (16.48)            | 181 (15.31)                          | 1,106,024 (41.90)                  | 0.26                                          | 0.58                                  | 0.62                                                |
| Two or more                                           | 29,258 (62.83)              | 3,308 (79.35)          | 942 (79.70)                          | 962,480 (36.46)                    | 0.55                                          | 0.96                                  | 0.97                                                |
| <b>Long-term care, no. (%)</b>                        | 1,710 (3.67)                | 415 (9.95)             | 133 (11.25)                          | 9,495 (0.36)                       | 0.24                                          | 0.44                                  | 0.48                                                |

| Baseline Characteristics                    | Non-hospitalized (N=46,568) | Hospitalized (N=4,169) | Admitted to intensive care (N=1,182) | Contemporary control (N=2,639,550) | Absolute standardized difference <sup>†</sup> |                                       |                                                     |
|---------------------------------------------|-----------------------------|------------------------|--------------------------------------|------------------------------------|-----------------------------------------------|---------------------------------------|-----------------------------------------------------|
|                                             |                             |                        |                                      |                                    | Non-hospitalized and Contemporary control     | Hospitalized and Contemporary control | Admitted to intensive care and Contemporary control |
| eGFR, mean (std), ml/min/1.73m <sup>2</sup> | 85.34 (20.32)               | 75.31 (25.81)          | 72.43 (27.01)                        | 82.47 (19.06)                      | 0.15                                          | 0.32                                  | 0.43                                                |
| Systolic blood pressure, mean (std), mmHg   | 130.20 (12.19)              | 133.04 (12.60)         | 134.24 (13.73)                       | 131.35 (12.61)                     | 0.09                                          | 0.14                                  | 0.22                                                |
| Diastolic blood pressure, mean (std), mmHg  | 78.58 (7.66)                | 77.84 (7.88)           | 78.33 (8.50)                         | 77.82 (7.65)                       | 0.00                                          | 0.00                                  | 0.06                                                |
| Comorbidities                               |                             |                        |                                      |                                    |                                               |                                       |                                                     |
| Cancer, no. (%)                             | 2,070 (4.45)                | 479 (11.49)            | 167 (14.13)                          | 96,402 (3.65)                      | 0.04                                          | 0.30                                  | 0.37                                                |
| Cardiovascular disease, no. (%)             | 2,268 (4.87)                | 554 (13.29)            | 203 (17.17)                          | 125,667 (4.76)                     | 0.01                                          | 0.30                                  | 0.41                                                |
| Cerebrovascular disease, no. (%)            | 697 (1.50)                  | 208 (4.99)             | 51 (4.32)                            | 23,676 (0.90)                      | 0.06                                          | 0.24                                  | 0.22                                                |
| Chronic kidney disease, no. (%)             | 4,318 (9.27)                | 1,069 (25.64)          | 337 (28.51)                          | 276,693 (10.48)                    | 0.04                                          | 0.40                                  | 0.47                                                |
| Chronic lung disease, no. (%)               | 4,267 (9.16)                | 789 (18.93)            | 270 (22.84)                          | 168,381 (6.38)                     | 0.10                                          | 0.38                                  | 0.48                                                |
| Diabetes mellitus type 2, no. (%)           | 4,798 (10.30)               | 807 (19.36)            | 284 (24.03)                          | 220,998 (8.37)                     | 0.07                                          | 0.32                                  | 0.43                                                |
| Hypertension, no. (%)                       | 9,773 (20.99)               | 1,204 (28.88)          | 384 (32.49)                          | 585,288 (22.17)                    | 0.03                                          | 0.15                                  | 0.23                                                |
| Prescription medications                    |                             |                        |                                      |                                    |                                               |                                       |                                                     |
| Anti-epileptics, no. (%)                    | 162 (0.35)                  | 18 (0.43)              | 3 (0.25)                             | 5,839 (0.22)                       | 0.02                                          | 0.04                                  | 0.01                                                |
| Anti-psychotics, no. (%)                    | 2,108 (4.53)                | 347 (8.32)             | 62 (5.25)                            | 79,453 (3.01)                      | 0.08                                          | 0.23                                  | 0.11                                                |
| β-blockers, no. (%)                         | 3,756 (8.07)                | 614 (14.73)            | 176 (14.89)                          | 153,353 (5.81)                     | 0.09                                          | 0.30                                  | 0.30                                                |
| Corticosteroids, no. (%)                    | 689 (1.48)                  | 147 (3.53)             | 43 (3.64)                            | 24,867 (0.94)                      | 0.05                                          | 0.18                                  | 0.18                                                |
| Diuretics, no. (%)                          | 4,725 (10.15)               | 763 (18.30)            | 254 (21.49)                          | 174,329 (6.60)                     | 0.13                                          | 0.36                                  | 0.44                                                |

| Baseline Characteristics                | Non-hospitalized (N=46,568) | Hospitalized (N=4,169) | Admitted to intensive care (N=1,182) | Contemporary control (N=2,639,550) | Absolute standardized difference <sup>†</sup> |                                       |                                                     |
|-----------------------------------------|-----------------------------|------------------------|--------------------------------------|------------------------------------|-----------------------------------------------|---------------------------------------|-----------------------------------------------------|
|                                         |                             |                        |                                      |                                    | Non-hospitalized and Contemporary control     | Hospitalized and Contemporary control | Admitted to intensive care and Contemporary control |
| <b>HIV protease inhibitors, no. (%)</b> | 39 (0.08)                   | 2 (0.05)               | 1 (0.09)                             | 926 (0.04)                         | 0.02                                          | 0.01                                  | 0.02                                                |
| <b>Immuno-suppressants, no. (%)</b>     | 399 (0.86)                  | 49 (1.18)              | 14 (1.18)                            | 13,310 (0.50)                      | 0.04                                          | 0.07                                  | 0.07                                                |
| <b>Hormone therapeutics, no. (%)</b>    | 1,377 (2.96)                | 66 (1.58)              | 24 (2.03)                            | 36,795 (1.39)                      | 0.11                                          | 0.02                                  | 0.05                                                |
| <b>SGLT-2 inhibitors, no. (%)</b>       | 147 (0.32)                  | 20 (0.48)              | 11 (0.93)                            | 5,250 (0.20)                       | 0.02                                          | 0.05                                  | 0.10                                                |

<sup>†</sup>. Standardized difference less than 0.15 is considered good balance.  
<sup>‡</sup>. Area Deprivation Index is a measure of socioeconomic disadvantage, with a range from low to high disadvantage of 0 to 100.  
<sup>a</sup>. Data collected within one year of cohort enrollment.  
<sup>b</sup>. Nursing homes and assisted-living centers.  
std, standard deviation; BMI, body mass index; eGFR, estimated glomerular filtration rate; HIV, Human immunodeficiency virus; SGLT, sodium glucose cotransporter.

**Appendix Table 7. Demographic and health characteristics of the COVID-19 and contemporary cohorts by care setting of the acute infection after weighting**

| Baseline Characteristics                              | Non-hospitalized (N=46,568) | Hospitalized (N=4,169) | Admitted to intensive care (N=1,182) | Contemporary control (N=2,639,550) | Absolute standardized difference <sup>†</sup> |                                       |                                                     |
|-------------------------------------------------------|-----------------------------|------------------------|--------------------------------------|------------------------------------|-----------------------------------------------|---------------------------------------|-----------------------------------------------------|
|                                                       |                             |                        |                                      |                                    | Non-hospitalized and Contemporary control     | Hospitalized and Contemporary control | Admitted to intensive care and Contemporary control |
| <b>Age, mean (std), yr</b>                            | 59.75 (18.33)               | 60.13 (17.91)          | 59.95 (18.39)                        | 60.20 (18.27)                      | 0.02                                          | 0.00                                  | 0.01                                                |
| <b>Race, no. (%)</b>                                  |                             |                        |                                      |                                    |                                               |                                       |                                                     |
| White                                                 | 34,445 (73.97)              | 3,060 (73.40)          | 840 (71.03)                          | 1,989,851 (75.39)                  | 0.03                                          | 0.05                                  | 0.10                                                |
| Black                                                 | 9,875 (21.21)               | 924 (22.16)            | 268 (22.65)                          | 523,845 (19.85)                    | 0.03                                          | 0.06                                  | 0.07                                                |
| Other                                                 | 2,248 (4.83)                | 185 (4.44)             | 75 (6.32)                            | 125,854 (4.77)                     | 0.00                                          | 0.02                                  | 0.07                                                |
| <b>Sex, no. (%)</b>                                   |                             |                        |                                      |                                    |                                               |                                       |                                                     |
| Male                                                  | 40,168 (86.26)              | 3,691 (88.53)          | 1057 (89.42)                         | 2,301,608 (87.20)                  | 0.03                                          | 0.04                                  | 0.07                                                |
| Female                                                | 6,400 (13.74)               | 478 (11.47)            | 125 (10.58)                          | 337,942 (12.80)                    | 0.03                                          | 0.04                                  | 0.07                                                |
| <b>BMI category, no. (%), kg/m<sup>2</sup></b>        |                             |                        |                                      |                                    |                                               |                                       |                                                     |
| Underweight/Normal                                    | 10,760 (23.11)              | 982 (23.55)            | 265 (22.39)                          | 597,594 (22.64)                    | 0.01                                          | 0.02                                  | 0.01                                                |
| Overweight                                            | 17,255 (37.05)              | 1,505 (36.09)          | 404 (34.18)                          | 1,113,837 (42.20)                  | 0.11                                          | 0.12                                  | 0.14                                                |
| Obese                                                 | 18,553 (39.84)              | 1,682 (40.35)          | 513 (43.43)                          | 928,119 (35.16)                    | 0.10                                          | 0.11                                  | 0.14                                                |
| <b>Smoking status, no. (%)</b>                        |                             |                        |                                      |                                    |                                               |                                       |                                                     |
| Never                                                 | 22,107 (47.47)              | 1,858 (44.58)          | 564 (47.68)                          | 1,313,757 (49.77)                  | 0.05                                          | 0.10                                  | 0.04                                                |
| Former                                                | 14,409 (30.94)              | 1,248 (29.93)          | 342 (28.91)                          | 777,400 (29.45)                    | 0.03                                          | 0.01                                  | 0.01                                                |
| Current                                               | 10,052 (21.59)              | 1,063 (25.50)          | 277 (23.41)                          | 548,367 (20.78)                    | 0.02                                          | 0.11                                  | 0.06                                                |
| <b>Area Deprivation Index<sup>‡</sup>, mean (std)</b> | 53.06 (19.08)               | 53.21 (19.58)          | 54.67 (19.42)                        | 52.66 (19.14)                      | 0.02                                          | 0.03                                  | 0.10                                                |
| <b>Clinical Characteristics</b>                       |                             |                        |                                      |                                    |                                               |                                       |                                                     |
| <b>Outpatient encounter<sup>a</sup>, no. (%)</b>      |                             |                        |                                      |                                    |                                               |                                       |                                                     |
| Zero                                                  | 10,002 (21.48)              | 783 (18.77)            | 202 (17.09)                          | 563,861 (21.36)                    | 0.00                                          | 0.06                                  | 0.11                                                |
| One                                                   | 18,762 (40.29)              | 1,765 (42.33)          | 529 (44.76)                          | 1,098,950 (41.63)                  | 0.03                                          | 0.01                                  | 0.06                                                |
| Two or more                                           | 17,804 (38.23)              | 1,621 (38.89)          | 451 (38.16)                          | 976,739 (37.00)                    | 0.03                                          | 0.04                                  | 0.02                                                |
| <b>Long-term care, no. (%)</b>                        | 285 (0.61)                  | 40 (0.97)              | 13 (1.07)                            | 11,403 (0.43)                      | 0.02                                          | 0.06                                  | 0.07                                                |

| Baseline Characteristics                    | Non-hospitalized (N=46,568) | Hospitalized (N=4,169) | Admitted to intensive care (N=1,182) | Contemporary control (N=2,639,550) | Absolute standardized difference <sup>†</sup> |                                       |                                                     |
|---------------------------------------------|-----------------------------|------------------------|--------------------------------------|------------------------------------|-----------------------------------------------|---------------------------------------|-----------------------------------------------------|
|                                             |                             |                        |                                      |                                    | Non-hospitalized and Contemporary control     | Hospitalized and Contemporary control | Admitted to intensive care and Contemporary control |
| eGFR, mean (std), ml/min/1.73m <sup>2</sup> | 82.59 (19.68)               | 82.07 (20.59)          | 82.22 (21.85)                        | 82.51 (19.10)                      | 0.00                                          | 0.02                                  | 0.01                                                |
| Systolic blood pressure, mean (std), mmHg   | 131.22 (12.87)              | 131.74 (12.70)         | 132.24 (12.53)                       | 131.33 (12.60)                     | 0.01                                          | 0.03                                  | 0.07                                                |
| Diastolic blood pressure, mean (std), mmHg  | 77.87 (7.79)                | 78.35 (7.78)           | 78.20 (7.94)                         | 77.83 (7.65)                       | 0.00                                          | 0.07                                  | 0.05                                                |
| Comorbidities                               |                             |                        |                                      |                                    |                                               |                                       |                                                     |
| Cancer, no. (%)                             | 1,798 (3.86)                | 173 (4.14)             | 47 (3.97)                            | 97,162 (3.68)                      | 0.01                                          | 0.02                                  | 0.02                                                |
| Cardiovascular disease, no. (%)             | 2,310 (4.96)                | 242 (5.79)             | 72 (6.10)                            | 126,144 (4.78)                     | 0.01                                          | 0.05                                  | 0.06                                                |
| Cerebrovascular disease, no. (%)            | 477 (1.02)                  | 55 (1.32)              | 14 (1.22)                            | 24,125 (0.91)                      | 0.01                                          | 0.04                                  | 0.03                                                |
| Chronic kidney disease, no. (%)             | 5,263 (11.30)               | 540 (12.96)            | 166 (14.01)                          | 276,915 (10.49)                    | 0.03                                          | 0.08                                  | 0.11                                                |
| Chronic lung disease, no. (%)               | 3,250 (6.98)                | 322 (7.73)             | 86 (7.30)                            | 170,304 (6.45)                     | 0.02                                          | 0.05                                  | 0.03                                                |
| Diabetes mellitus type 2, no. (%)           | 4,060 (8.72)                | 429 (10.29)            | 135 (11.41)                          | 222,435 (8.43)                     | 0.01                                          | 0.06                                  | 0.10                                                |
| Hypertension, no. (%)                       | 10,732 (23.05)              | 1,052 (25.23)          | 308 (26.02)                          | 585,109 (22.17)                    | 0.02                                          | 0.07                                  | 0.09                                                |
| Prescription medications                    |                             |                        |                                      |                                    |                                               |                                       |                                                     |
| Anti-epileptics, no. (%)                    | 129 (0.28)                  | 7 (0.17)               | 1 (0.12)                             | 5,913 (0.22)                       | 0.01                                          | 0.01                                  | 0.03                                                |
| Anti-psychotics, no. (%)                    | 1,587 (3.41)                | 180 (4.32)             | 55 (4.70)                            | 80,348 (3.04)                      | 0.02                                          | 0.07                                  | 0.09                                                |
| β-blockers, no. (%)                         | 3,084 (6.62)                | 327 (7.83)             | 84 (7.09)                            | 154,810 (5.87)                     | 0.03                                          | 0.08                                  | 0.05                                                |
| Corticosteroids, no. (%)                    | 509 (1.09)                  | 52 (1.26)              | 16 (1.32)                            | 25,234 (0.96)                      | 0.01                                          | 0.03                                  | 0.03                                                |
| Diuretics, no. (%)                          | 3,514 (7.55)                | 327 (7.84)             | 105 (8.85)                           | 176,533 (6.69)                     | 0.03                                          | 0.04                                  | 0.08                                                |

| Baseline Characteristics         | Non-hospitalized (N=46,568) | Hospitalized (N=4,169) | Admitted to intensive care (N=1,182) | Contemporary control (N=2,639,550) | Absolute standardized difference <sup>†</sup> |                                       |                                                     |
|----------------------------------|-----------------------------|------------------------|--------------------------------------|------------------------------------|-----------------------------------------------|---------------------------------------|-----------------------------------------------------|
|                                  |                             |                        |                                      |                                    | Non-hospitalized and Contemporary control     | Hospitalized and Contemporary control | Admitted to intensive care and Contemporary control |
| HIV protease inhibitors, no. (%) | 19 (0.04)                   | 1 (0.03)               | 0 (0.00)                             | 950 (0.04)                         | 0.00                                          | 0.00                                  | 0.03                                                |
| Immuno-suppressants, no. (%)     | 256 (0.55)                  | 22 (0.53)              | 6 (0.52)                             | 13,514 (0.51)                      | 0.01                                          | 0.00                                  | 0.00                                                |
| Hormone therapeutics, no. (%)    | 719 (1.55)                  | 47 (1.14)              | 18 (1.49)                            | 37,534 (1.42)                      | 0.01                                          | 0.03                                  | 0.01                                                |
| SGLT-2 inhibitors, no. (%)       | 104 (0.22)                  | 9 (0.22)               | 3 (0.26)                             | 5,332 (0.20)                       | 0.00                                          | 0.00                                  | 0.01                                                |

<sup>†</sup>. Standardized difference less than 0.15 is considered good balance.  
<sup>‡</sup>. Area Deprivation Index is a measure of socioeconomic disadvantage, with a range from low to high disadvantage of 0 to 100.  
<sup>a</sup>. Data collected within one year of cohort enrollment.  
<sup>b</sup>. Nursing homes and assisted-living centers.  
std, standard deviation; BMI, body mass index; eGFR, estimated glomerular filtration rate; HIV, Human immunodeficiency virus; SGLT, sodium glucose cotransporter.

**Appendix Table 8. Risks and 12-month burdens of post-acute COVID-19 dyslipidemia outcomes by care setting of the acute infection compared to contemporary control**

| Outcome*                                      | Care setting†              | Hazard ratio (95% CI)‡           | COVID-19 burden per 1000 persons at 12 months (95% CI)‡ | Contemporary control burden per 1000 persons at 12 months (95% CI)‡ | Burden difference per 1000 persons at 12 months (95% CI)‡ |
|-----------------------------------------------|----------------------------|----------------------------------|---------------------------------------------------------|---------------------------------------------------------------------|-----------------------------------------------------------|
|                                               |                            | COVID-19 vs Contemporary control |                                                         |                                                                     |                                                           |
| <b>Abnormal lipid lab results</b>             | Non-hospitalized           | 1.28 (1.25, 1.31)                | 231.46 (227.03, 235.96)                                 | 186.03<br>(185.59, 186.48)                                          | 45.43 (41.00, 49.92)                                      |
|                                               | Hospitalized               | 1.52 (1.39, 1.68)                | 269.32 (248.10, 291.98)                                 |                                                                     | 83.29 (62.06, 105.95)                                     |
|                                               | Admitted to intensive care | 1.91 (1.61, 2.27)                | 325.34 (281.70, 373.80)                                 |                                                                     | 139.31 (95.67, 187.77)                                    |
| Total cholesterol>200 mg/dL                   | Non-hospitalized           | 1.31 (1.27, 1.35)                | 122.30 (118.96, 125.72)                                 | 94.73<br>(94.4, 95.07)                                              | 27.56 (24.22, 30.99)                                      |
|                                               | Hospitalized               | 1.62 (1.42, 1.85)                | 149.27 (132.00, 168.56)                                 |                                                                     | 54.53 (37.27, 73.83)                                      |
|                                               | Admitted to intensive care | 1.57 (1.22, 2.02)                | 144.71 (114.34, 182.27)                                 |                                                                     | 49.97 (19.61, 87.53)                                      |
| Triglycerides>150 mg/dL                       | Non-hospitalized           | 1.30 (1.26, 1.34)                | 112.79 (109.58, 116.09)                                 | 87.85<br>(87.52, 88.17)                                             | 24.94 (21.73, 28.24)                                      |
|                                               | Hospitalized               | 1.68 (1.47, 1.91)                | 142.75 (126.54, 160.84)                                 |                                                                     | 54.90 (38.69, 72.99)                                      |
|                                               | Admitted to intensive care | 2.21 (1.78, 2.76)                | 184.23 (150.95, 223.84)                                 |                                                                     | 96.39 (63.10, 135.99)                                     |
| LDL>130 mg/dL                                 | Non-hospitalized           | 1.30 (1.26, 1.35)                | 101.68 (98.64, 104.82)                                  | 78.92<br>(78.61, 79.23)                                             | 22.76 (19.72, 25.89)                                      |
|                                               | Hospitalized               | 1.67 (1.45, 1.93)                | 128.42 (112.26, 146.71)                                 |                                                                     | 49.50 (33.33, 67.79)                                      |
|                                               | Admitted to intensive care | 1.54 (1.17, 2.03)                | 119.25 (92.03, 153.80)                                  |                                                                     | 40.33 (13.11, 74.88)                                      |
| HDL<40 mg/dL                                  | Non-hospitalized           | 1.21 (1.17, 1.25)                | 97.35 (94.36, 100.43)                                   | 81.11<br>(80.80, 81.42)                                             | 16.24 (13.25, 19.32)                                      |
|                                               | Hospitalized               | 1.66 (1.46, 1.90)                | 131.14 (115.89, 148.22)                                 |                                                                     | 50.03 (34.79, 67.11)                                      |
|                                               | Admitted to intensive care | 2.08 (1.64, 2.63)                | 161.17 (129.72, 199.32)                                 |                                                                     | 80.06 (48.61, 118.22)                                     |
| <b>Lipid-lowering medication prescription</b> | Non-hospitalized           | 1.41 (1.35, 1.47)                | 70.54 (67.79, 73.41)                                    | 50.66<br>(50.41, 50.91)                                             | 19.89 (17.13, 22.75)                                      |
|                                               | Hospitalized               | 3.50 (3.09, 3.98)                | 166.55 (148.22, 186.89)                                 |                                                                     | 115.89 (97.56, 136.23)                                    |
|                                               | Admitted to intensive care | 4.69 (3.80, 5.78)                | 216.24 (179.28, 259.54)                                 |                                                                     | 165.58 (128.63, 208.88)                                   |
| Statins                                       | Non-hospitalized           | 1.41 (1.36, 1.47)                | 68.75 (66.01, 71.59)                                    | 49.12<br>(48.87, 49.37)                                             | 19.63 (16.90, 22.47)                                      |
|                                               | Hospitalized               | 3.38 (2.97, 3.85)                | 156.61 (139.09, 176.10)                                 |                                                                     | 107.49 (89.97, 126.98)                                    |
|                                               | Admitted to intensive care | 4.75 (3.85, 5.88)                | 212.95 (176.17, 256.14)                                 |                                                                     | 163.84 (127.05, 207.03)                                   |
| Bile acid resins                              | Non-hospitalized           | 1.30 (1.01, 1.69)                | 1.35 (1.04, 1.74)                                       | 1.04<br>(1.00, 1.07)                                                | 0.31 (0.01, 0.71)                                         |
|                                               | Hospitalized               | 7.90 (3.54, 17.62)               | 8.15 (3.66, 18.09)                                      |                                                                     | 7.11 (2.63, 17.06)                                        |
|                                               | Admitted to intensive care | 2.48 (0.62, 9.95)                | 2.57 (0.64, 10.25)                                      |                                                                     | 1.53 (-0.39, 9.22)                                        |
| Fibrates                                      | Non-hospitalized           | 1.23 (0.92, 1.64)                | 1.21 (0.90, 1.61)                                       | 0.98<br>(0.95, 1.02)                                                | 0.22 (-0.08, 0.63)                                        |
|                                               | Hospitalized               | 3.16 (1.32, 7.58)                | 3.10 (1.29, 7.42)                                       |                                                                     | 2.12 (0.31, 6.44)                                         |
|                                               | Admitted to intensive care | 2.22 (0.74, 6.71)                | 2.18 (0.72, 6.57)                                       |                                                                     | 1.20 (-0.26, 5.59)                                        |



| Outcome*                 | Care setting†              | Hazard ratio (95% CI)‡           | COVID-19 burden per 1000 persons at 12 months (95% CI)‡ | Contemporary control burden per 1000 persons at 12 months (95% CI)‡ | Burden difference per 1000 persons at 12 months (95% CI)‡ |
|--------------------------|----------------------------|----------------------------------|---------------------------------------------------------|---------------------------------------------------------------------|-----------------------------------------------------------|
|                          |                            | COVID-19 vs Contemporary control |                                                         |                                                                     |                                                           |
| Any dyslipidemia outcome | Non-hospitalized           | 1.31 (1.28, 1.33)                | 260.15 (255.51, 264.86)                                 | 206.00<br>(205.54, 206.46)                                          | 54.15 (49.51, 58.86)                                      |
|                          | Hospitalized               | 1.92 (1.76, 2.09)                | 358.18 (334.31, 383.22)                                 |                                                                     | 152.18 (128.31, 177.22)                                   |
|                          | Admitted to intensive care | 2.52 (2.15, 2.94)                | 440.27 (391.06, 492.83)                                 |                                                                     | 234.27 (185.06, 286.83)                                   |

\*. Outcomes were ascertained from day 30 after the initial positive COVID-19 test result until end of follow up.  
†. Based on care received within the first 30 days after a positive COVID-19 test result.  
‡. Adjustment through inverse probability weighting using predefined variables and algorithmically selected high-dimensional variables. Burdens were computed based on the estimated survival probability at 12 month.  
CI, confidence interval; LDL, low-density lipoprotein HDL, high-density lipoprotein.

**Appendix Table 9. Demographic and health characteristics of the COVID-19 and historical cohorts by care setting of the acute infection before weighting**

| Baseline Characteristics                              | Non-hospitalized (N=46,568) | Hospitalized (N=4,169) | Admitted to intensive care (N=1,182) | Historical control (N=2,527,864) | Absolute standardized difference <sup>†</sup> |                                     |                                                   |
|-------------------------------------------------------|-----------------------------|------------------------|--------------------------------------|----------------------------------|-----------------------------------------------|-------------------------------------|---------------------------------------------------|
|                                                       |                             |                        |                                      |                                  | Non-hospitalized and Historical control       | Hospitalized and Historical control | Admitted to intensive care and Historical control |
| <b>Age, mean (std), yr</b>                            | 54.76 (17.42)               | 65.61 (16.80)          | 66.93 (15.55)                        | 59.82 (18.68)                    | 0.28                                          | 0.33                                | 0.41                                              |
| <b>Race, no. (%)</b>                                  |                             |                        |                                      |                                  |                                               |                                     |                                                   |
| White                                                 | 32,057 (68.84)              | 2,490 (59.73)          | 684 (57.87)                          | 1,913,622 (75.70)                | 0.15                                          | 0.35                                | 0.39                                              |
| Black                                                 | 12,137 (26.06)              | 1,443 (34.61)          | 425 (35.96)                          | 493,013 (19.50)                  | 0.16                                          | 0.35                                | 0.37                                              |
| Other                                                 | 2,374 (5.10)                | 236 (5.66)             | 73 (6.18)                            | 121,229 (4.80)                   | 0.01                                          | 0.04                                | 0.06                                              |
| <b>Sex, no. (%)</b>                                   |                             |                        |                                      |                                  |                                               |                                     |                                                   |
| Male                                                  | 37,988 (81.58)              | 3,785 (90.79)          | 1,085 (91.79)                        | 2,203,499 (87.17)                | 0.15                                          | 0.12                                | 0.15                                              |
| Female                                                | 8,580 (18.43)               | 384 (9.21)             | 97 (8.21)                            | 324,365 (12.83)                  | 0.15                                          | 0.12                                | 0.15                                              |
| <b>BMI category, no. (%), kg/m<sup>2</sup></b>        |                             |                        |                                      |                                  |                                               |                                     |                                                   |
| Underweight/Normal                                    | 8,582 (18.43)               | 1,113 (26.70)          | 282 (23.86)                          | 594,926 (23.54)                  | 0.13                                          | 0.07                                | 0.01                                              |
| Overweight                                            | 15,877 (34.09)              | 1,348 (32.33)          | 375 (31.73)                          | 1,125,212 (44.51)                | 0.21                                          | 0.25                                | 0.27                                              |
| Obese                                                 | 22,109 (47.48)              | 1,708 (40.97)          | 525 (44.42)                          | 807,726 (31.95)                  | 0.32                                          | 0.19                                | 0.26                                              |
| <b>Smoking status, no. (%)</b>                        |                             |                        |                                      |                                  |                                               |                                     |                                                   |
| Never                                                 | 23,918 (51.36)              | 1,920 (46.05)          | 532 (45.01)                          | 1,539,652 (60.91)                | 0.19                                          | 0.30                                | 0.32                                              |
| Former                                                | 14,777 (31.73)              | 1,397 (33.51)          | 445 (37.65)                          | 476,117 (18.84)                  | 0.30                                          | 0.34                                | 0.43                                              |
| Current                                               | 7,873 (16.91)               | 852 (20.44)            | 205 (17.34)                          | 512,095 (20.26)                  | 0.09                                          | 0.00                                | 0.07                                              |
| <b>Area Deprivation Index<sup>‡</sup>, mean (std)</b> | 53.10 (18.60)               | 51.73 (18.64)          | 53.50 (18.86)                        | 52.39 (19.26)                    | 0.04                                          | 0.03                                | 0.06                                              |
| Clinical Characteristics                              |                             |                        |                                      |                                  |                                               |                                     |                                                   |
| <b>Outpatient encounter<sup>a</sup>, no. (%)</b>      |                             |                        |                                      |                                  |                                               |                                     |                                                   |
| Zero                                                  | 3,564 (7.65)                | 174 (4.17)             | 59 (4.99)                            | 537,170 (21.25)                  | 0.39                                          | 0.53                                | 0.50                                              |
| One                                                   | 13,746 (29.52)              | 687 (16.48)            | 181 (15.31)                          | 1,058,008 (41.85)                | 0.26                                          | 0.58                                | 0.61                                              |
| Two or more                                           | 29,258 (62.83)              | 3,308 (79.35)          | 942 (79.70)                          | 932,686 (36.90)                  | 0.54                                          | 0.95                                | 0.96                                              |
| <b>Long-term care, no. (%)</b>                        | 1,710 (3.67)                | 415 (9.95)             | 133 (11.25)                          | 12,077 (0.48)                    | 0.23                                          | 0.44                                | 0.47                                              |

| Baseline Characteristics                    | Non-hospitalized (N=46,568) | Hospitalized (N=4,169) | Admitted to intensive care (N=1,182) | Historical control (N=2,527,864) | Absolute standardized difference <sup>†</sup> |                                     |                                                   |
|---------------------------------------------|-----------------------------|------------------------|--------------------------------------|----------------------------------|-----------------------------------------------|-------------------------------------|---------------------------------------------------|
|                                             |                             |                        |                                      |                                  | Non-hospitalized and Historical control       | Hospitalized and Historical control | Admitted to intensive care and Historical control |
| eGFR, mean (std), ml/min/1.73m <sup>2</sup> | 85.34 (20.32)               | 75.31 (25.81)          | 72.43 (27.01)                        | 82.78 (18.24)                    | 0.13                                          | 0.33                                | 0.45                                              |
| Systolic blood pressure, mean (std), mmHg   | 130.20 (12.19)              | 133.04 (12.60)         | 134.24 (13.73)                       | 131.42 (12.75)                   | 0.10                                          | 0.13                                | 0.21                                              |
| Diastolic blood pressure, mean (std), mmHg  | 78.58 (7.66)                | 77.84 (7.88)           | 78.33 (8.50)                         | 77.53 (7.91)                     | 0.13                                          | 0.04                                | 0.10                                              |
| Comorbidities                               |                             |                        |                                      |                                  |                                               |                                     |                                                   |
| Cancer, no. (%)                             | 2,070 (4.45)                | 479 (11.49)            | 167 (14.13)                          | 88,509 (3.50)                    | 0.05                                          | 0.31                                | 0.38                                              |
| Cardiovascular disease, no. (%)             | 2,268 (4.87)                | 554 (13.29)            | 203 (17.17)                          | 121,662 (4.81)                   | 0.00                                          | 0.30                                | 0.40                                              |
| Cerebrovascular disease, no. (%)            | 697 (1.50)                  | 208 (4.99)             | 51 (4.32)                            | 23,513 (0.93)                    | 0.05                                          | 0.24                                | 0.21                                              |
| Chronic kidney disease, no. (%)             | 4,318 (9.27)                | 1,069 (25.64)          | 337 (28.51)                          | 227,455 (9.00)                   | 0.01                                          | 0.45                                | 0.52                                              |
| Chronic lung disease, no. (%)               | 4,267 (9.16)                | 789 (18.93)            | 270 (22.84)                          | 163,302 (6.46)                   | 0.10                                          | 0.38                                | 0.48                                              |
| Diabetes mellitus type 2, no. (%)           | 4,798 (10.30)               | 807 (19.36)            | 284 (24.03)                          | 209,339 (8.28)                   | 0.07                                          | 0.33                                | 0.44                                              |
| Hypertension, no. (%)                       | 9,773 (20.99)               | 1,204 (28.88)          | 384 (32.49)                          | 538,947 (21.32)                  | 0.01                                          | 0.18                                | 0.25                                              |
| Prescription medications                    |                             |                        |                                      |                                  |                                               |                                     |                                                   |
| Anti-epileptics, no. (%)                    | 162 (0.35)                  | 18 (0.43)              | 3 (0.25)                             | 5,892 (0.23)                     | 0.02                                          | 0.03                                | 0.00                                              |
| Anti-psychotics, no. (%)                    | 2,108 (4.53)                | 347 (8.32)             | 62 (5.25)                            | 70,528 (2.79)                    | 0.09                                          | 0.24                                | 0.13                                              |
| β-blockers, no. (%)                         | 3,756 (8.07)                | 614 (14.73)            | 176 (14.89)                          | 139,436 (5.52)                   | 0.10                                          | 0.31                                | 0.31                                              |
| Corticosteroids, no. (%)                    | 689 (1.48)                  | 147 (3.53)             | 43 (3.64)                            | 26,456 (1.05)                    | 0.04                                          | 0.17                                | 0.17                                              |
| Diuretics, no. (%)                          | 4,725 (10.15)               | 763 (18.30)            | 254 (21.49)                          | 164,524 (6.51)                   | 0.13                                          | 0.36                                | 0.44                                              |

| Baseline Characteristics                | Non-hospitalized (N=46,568) | Hospitalized (N=4,169) | Admitted to intensive care (N=1,182) | Historical control (N=2,527,864) | Absolute standardized difference <sup>†</sup> |                                     |                                                   |
|-----------------------------------------|-----------------------------|------------------------|--------------------------------------|----------------------------------|-----------------------------------------------|-------------------------------------|---------------------------------------------------|
|                                         |                             |                        |                                      |                                  | Non-hospitalized and Historical control       | Hospitalized and Historical control | Admitted to intensive care and Historical control |
| <b>HIV protease inhibitors, no. (%)</b> | 39 (0.08)                   | 2 (0.05)               | 1 (0.09)                             | 1,266 (0.05)                     | 0.01                                          | 0.00                                | 0.01                                              |
| <b>Immuno-suppressants, no. (%)</b>     | 399 (0.86)                  | 49 (1.18)              | 14 (1.18)                            | 10,571 (0.42)                    | 0.06                                          | 0.09                                | 0.09                                              |
| <b>Hormone therapeutics, no. (%)</b>    | 1,377 (2.96)                | 66 (1.58)              | 24 (2.03)                            | 33,996 (1.35)                    | 0.11                                          | 0.02                                | 0.05                                              |
| <b>SGLT-2 inhibitors, no. (%)</b>       | 147 (0.32)                  | 20 (0.48)              | 11 (0.93)                            | 1,079 (0.04)                     | 0.06                                          | 0.09                                | 0.13                                              |

<sup>†</sup>. Standardized difference less than 0.15 is considered good balance.  
<sup>‡</sup>. Area Deprivation Index is a measure of socioeconomic disadvantage, with a range from low to high disadvantage of 0 to 100.  
<sup>a</sup>. Data collected within one year of cohort enrollment.  
<sup>b</sup>. Nursing homes and assisted-living centers.  
std, standard deviation; BMI, body mass index; eGFR, estimated glomerular filtration rate; HIV, Human immunodeficiency virus; SGLT, sodium glucose cotransporter.

**Appendix Table 10. Demographic and health characteristics of the COVID-19 and historical cohorts by care setting of the acute infection after weighting**

| Baseline Characteristics                              | Non-hospitalized (N=46,568) | Hospitalized (N=4,169) | Admitted to intensive care (N=1,182) | Historical control (N=2,527,864) | Absolute standardized difference <sup>†</sup> |                                     |                                                   |
|-------------------------------------------------------|-----------------------------|------------------------|--------------------------------------|----------------------------------|-----------------------------------------------|-------------------------------------|---------------------------------------------------|
|                                                       |                             |                        |                                      |                                  | Non-hospitalized and Historical control       | Hospitalized and Historical control | Admitted to intensive care and Historical control |
| <b>Age, mean (std), yr</b>                            | 59.75 (18.33)               | 60.13 (17.91)          | 59.95 (18.39)                        | 60.15 (18.35)                    | 0.02                                          | 0.00                                | 0.01                                              |
| <b>Race, no. (%)</b>                                  |                             |                        |                                      |                                  |                                               |                                     |                                                   |
| White                                                 | 34,445 (73.97)              | 3,060 (73.40)          | 840 (71.03)                          | 1,904,265 (75.33)                | 0.03                                          | 0.04                                | 0.10                                              |
| Black                                                 | 9,875 (21.21)               | 924 (22.16)            | 268 (22.65)                          | 502,615 (19.88)                  | 0.03                                          | 0.06                                | 0.07                                              |
| Other                                                 | 2,248 (4.83)                | 185 (4.44)             | 75 (6.32)                            | 120,984 (4.79)                   | 0.00                                          | 0.02                                | 0.07                                              |
| <b>Sex, no. (%)</b>                                   |                             |                        |                                      |                                  |                                               |                                     |                                                   |
| Male                                                  | 40,168 (86.26)              | 3,691 (88.53)          | 1057 (89.42)                         | 2,203,135 (87.15)                | 0.03                                          | 0.04                                | 0.07                                              |
| Female                                                | 6,400 (13.74)               | 478 (11.47)            | 125 (10.58)                          | 324,729 (12.85)                  | 0.03                                          | 0.04                                | 0.07                                              |
| <b>BMI category, no. (%), kg/m<sup>2</sup></b>        |                             |                        |                                      |                                  |                                               |                                     |                                                   |
| Underweight/Normal                                    | 10,760 (23.11)              | 982 (23.55)            | 265 (22.39)                          | 574,027 (22.71)                  | 0.01                                          | 0.02                                | 0.01                                              |
| Overweight                                            | 17,255 (37.05)              | 1,505 (36.09)          | 404 (34.18)                          | 1,076,870 (42.60)                | 0.11                                          | 0.12                                | 0.14                                              |
| Obese                                                 | 18,553 (39.84)              | 1,682 (40.35)          | 513 (43.43)                          | 876,967 (34.69)                  | 0.11                                          | 0.12                                | 0.14                                              |
| <b>Smoking status, no. (%)</b>                        |                             |                        |                                      |                                  |                                               |                                     |                                                   |
| Never                                                 | 22,107 (47.47)              | 1,858 (44.58)          | 564 (47.68)                          | 1,257,916 (49.76)                | 0.05                                          | 0.10                                | 0.04                                              |
| Former                                                | 14,409 (30.94)              | 1,248 (29.93)          | 342 (28.91)                          | 744,001 (29.43)                  | 0.03                                          | 0.01                                | 0.01                                              |
| Current                                               | 10,052 (21.59)              | 1,063 (25.50)          | 277 (23.41)                          | 525,922 (20.81)                  | 0.02                                          | 0.11                                | 0.06                                              |
| <b>Area Deprivation Index<sup>‡</sup>, mean (std)</b> | 53.06 (19.08)               | 53.21 (19.58)          | 54.67 (19.42)                        | 52.65 (19.13)                    | 0.02                                          | 0.03                                | 0.10                                              |
| Clinical Characteristics                              |                             |                        |                                      |                                  |                                               |                                     |                                                   |
| <b>Outpatient encounter<sup>a</sup>, no. (%)</b>      |                             |                        |                                      |                                  |                                               |                                     |                                                   |
| Zero                                                  | 10,002 (21.48)              | 783 (18.77)            | 202 (17.09)                          | 535,225 (21.17)                  | 0.01                                          | 0.06                                | 0.10                                              |
| One                                                   | 18,762 (40.29)              | 1,765 (42.33)          | 529 (44.76)                          | 1,053,867 (41.69)                | 0.03                                          | 0.01                                | 0.06                                              |
| Two or more                                           | 17,804 (38.23)              | 1,621 (38.89)          | 451 (38.16)                          | 938,773 (37.14)                  | 0.02                                          | 0.04                                | 0.02                                              |
| <b>Long-term care, no. (%)</b>                        | 285 (0.61)                  | 40 (0.97)              | 13 (1.07)                            | 11,198 (0.44)                    | 0.02                                          | 0.06                                | 0.07                                              |

| Baseline Characteristics                    | Non-hospitalized (N=46,568) | Hospitalized (N=4,169) | Admitted to intensive care (N=1,182) | Historical control (N=2,527,864) | Absolute standardized difference <sup>†</sup> |                                     |                                                   |
|---------------------------------------------|-----------------------------|------------------------|--------------------------------------|----------------------------------|-----------------------------------------------|-------------------------------------|---------------------------------------------------|
|                                             |                             |                        |                                      |                                  | Non-hospitalized and Historical control       | Hospitalized and Historical control | Admitted to intensive care and Historical control |
| eGFR, mean (std), ml/min/1.73m <sup>2</sup> | 82.59 (19.68)               | 82.07 (20.59)          | 82.22 (21.85)                        | 82.58 (19.35)                    | 0.00                                          | 0.03                                | 0.02                                              |
| Systolic blood pressure, mean (std), mmHg   | 131.22 (12.87)              | 131.74 (12.70)         | 132.24 (12.53)                       | 131.29 (12.72)                   | 0.01                                          | 0.04                                | 0.08                                              |
| Diastolic blood pressure, mean (std), mmHg  | 77.87 (7.79)                | 78.35 (7.78)           | 78.20 (7.94)                         | 77.84 (7.72)                     | 0.00                                          | 0.07                                | 0.05                                              |
| Comorbidities                               |                             |                        |                                      |                                  |                                               |                                     |                                                   |
| Cancer, no. (%)                             | 1,798 (3.86)                | 173 (4.14)             | 47 (3.97)                            | 93,405 (3.70)                    | 0.01                                          | 0.02                                | 0.01                                              |
| Cardiovascular disease, no. (%)             | 2,310 (4.96)                | 242 (5.79)             | 72 (6.10)                            | 120,554 (4.77)                   | 0.01                                          | 0.05                                | 0.06                                              |
| Cerebrovascular disease, no. (%)            | 477 (1.02)                  | 55 (1.32)              | 14 (1.22)                            | 23,357 (0.92)                    | 0.01                                          | 0.04                                | 0.03                                              |
| Chronic kidney disease, no. (%)             | 5,263 (11.30)               | 540 (12.96)            | 166 (14.01)                          | 265,173 (10.49)                  | 0.03                                          | 0.08                                | 0.11                                              |
| Chronic lung disease, no. (%)               | 3,250 (6.98)                | 322 (7.73)             | 86 (7.30)                            | 163,528 (6.47)                   | 0.02                                          | 0.05                                | 0.03                                              |
| Diabetes mellitus type 2, no. (%)           | 4,060 (8.72)                | 429 (10.29)            | 135 (11.41)                          | 213,149 (8.43)                   | 0.01                                          | 0.06                                | 0.10                                              |
| Hypertension, no. (%)                       | 10,732 (23.05)              | 1,052 (25.23)          | 308 (26.02)                          | 561,742 (22.22)                  | 0.02                                          | 0.07                                | 0.09                                              |
| Prescription medications                    |                             |                        |                                      |                                  |                                               |                                     |                                                   |
| Anti-epileptics, no. (%)                    | 129 (0.28)                  | 7 (0.17)               | 1 (0.12)                             | 5,738 (0.23)                     | 0.01                                          | 0.01                                | 0.03                                              |
| Anti-psychotics, no. (%)                    | 1,587 (3.41)                | 180 (4.32)             | 55 (4.70)                            | 77,757 (3.08)                    | 0.02                                          | 0.07                                | 0.08                                              |
| β-blockers, no. (%)                         | 3,084 (6.62)                | 327 (7.83)             | 84 (7.09)                            | 149,371 (5.91)                   | 0.03                                          | 0.08                                | 0.05                                              |
| Corticosteroids, no. (%)                    | 509 (1.09)                  | 52 (1.26)              | 16 (1.32)                            | 24,318 (0.96)                    | 0.01                                          | 0.03                                | 0.03                                              |
| Diuretics, no. (%)                          | 3,514 (7.55)                | 327 (7.84)             | 105 (8.85)                           | 170,580 (6.75)                   | 0.03                                          | 0.04                                | 0.08                                              |

| Baseline Characteristics         | Non-hospitalized (N=46,568) | Hospitalized (N=4,169) | Admitted to intensive care (N=1,182) | Historical control (N=2,527,864) | Absolute standardized difference <sup>†</sup> |                                     |                                                   |
|----------------------------------|-----------------------------|------------------------|--------------------------------------|----------------------------------|-----------------------------------------------|-------------------------------------|---------------------------------------------------|
|                                  |                             |                        |                                      |                                  | Non-hospitalized and Historical control       | Hospitalized and Historical control | Admitted to intensive care and Historical control |
| HIV protease inhibitors, no. (%) | 19 (0.04)                   | 1 (0.03)               | 0 (0.00)                             | 910 (0.04)                       | 0.00                                          | 0.00                                | 0.03                                              |
| Immuno-suppressants, no. (%)     | 256 (0.55)                  | 22 (0.53)              | 6 (0.52)                             | 13,069 (0.52)                    | 0.00                                          | 0.00                                | 0.00                                              |
| Hormone therapeutics, no. (%)    | 719 (1.55)                  | 47 (1.14)              | 18 (1.49)                            | 36,578 (1.45)                    | 0.01                                          | 0.03                                | 0.00                                              |
| SGLT-2 inhibitors, no. (%)       | 104 (0.22)                  | 9 (0.22)               | 3 (0.26)                             | 4,955 (0.20)                     | 0.01                                          | 0.00                                | 0.01                                              |

<sup>†</sup>. Standardized difference less than 0.15 is considered good balance.  
<sup>‡</sup>. Area Deprivation Index is a measure of socioeconomic disadvantage, with a range from low to high disadvantage of 0 to 100.  
<sup>a</sup>. Data collected within one year of cohort enrollment.  
<sup>b</sup>. Nursing homes and assisted-living centers.  
std, standard deviation; BMI, body mass index; eGFR, estimated glomerular filtration rate; HIV, Human immunodeficiency virus; SGLT, sodium glucose cotransporter.

Appendix Table 11. Risks and 12-month burdens of post-acute COVID-19 dyslipidemia outcomes compared to historical control

| Outcome*                                                                                                                                                                                                                                                                                                                                                                                                                           | Hazard Ratio (95% CI)†         | COVID-19 burden per 1000 persons at 12 months (95% CI) † | Historical control burden per 1000 persons at 12 months (95% CI) † | Absolute burden difference per 1000 persons at 12 months (95% CI) † |
|------------------------------------------------------------------------------------------------------------------------------------------------------------------------------------------------------------------------------------------------------------------------------------------------------------------------------------------------------------------------------------------------------------------------------------|--------------------------------|----------------------------------------------------------|--------------------------------------------------------------------|---------------------------------------------------------------------|
|                                                                                                                                                                                                                                                                                                                                                                                                                                    | COVID-19 vs Historical control |                                                          |                                                                    |                                                                     |
| <b>Abnormal lipid lab results</b>                                                                                                                                                                                                                                                                                                                                                                                                  | 1.24 (1.21, 1.27)              | 223.20 (218.72, 227.75)                                  | 184.40 (183.96, 184.85)                                            | 38.79 (34.32, 43.34)                                                |
| Total cholesterol>200 mg/dL                                                                                                                                                                                                                                                                                                                                                                                                        | 1.32 (1.28, 1.36)              | 116.03 (112.72, 119.44)                                  | 89.39 (89.07, 89.72)                                               | 26.64 (23.32, 30.04)                                                |
| Triglycerides>150 mg/dL                                                                                                                                                                                                                                                                                                                                                                                                            | 1.27 (1.23, 1.31)              | 107.83 (104.65, 111.10)                                  | 86.24 (85.92, 86.57)                                               | 21.59 (18.41, 24.86)                                                |
| LDL>130 mg/dL                                                                                                                                                                                                                                                                                                                                                                                                                      | 1.31 (1.27, 1.36)              | 95.94 (92.92, 99.05)                                     | 74.08 (73.78, 74.38)                                               | 21.86 (18.84, 24.97)                                                |
| HDL<40 mg/dL                                                                                                                                                                                                                                                                                                                                                                                                                       | 1.22 (1.18, 1.26)              | 96.01 (92.95, 99.16)                                     | 79.51 (79.20, 79.82)                                               | 16.50 (13.44, 19.65)                                                |
| <b>Lipid-lowering medication prescription</b>                                                                                                                                                                                                                                                                                                                                                                                      | 1.51 (1.45, 1.57)              | 74.37 (71.48, 77.36)                                     | 49.88 (49.63, 50.13)                                               | 24.49 (21.60, 27.49)                                                |
| Statins                                                                                                                                                                                                                                                                                                                                                                                                                            | 1.51 (1.45, 1.58)              | 72.27 (69.41, 75.23)                                     | 48.35 (48.10, 48.59)                                               | 23.92 (21.07, 26.89)                                                |
| Bile acid resins                                                                                                                                                                                                                                                                                                                                                                                                                   | 1.59 (1.19, 2.12)              | 1.48 (1.11, 1.97)                                        | 0.93 (0.90, 0.97)                                                  | 0.55 (0.18, 1.04)                                                   |
| Fibrates                                                                                                                                                                                                                                                                                                                                                                                                                           | 1.51 (1.14, 2.01)              | 1.44 (1.08, 1.91)                                        | 0.95 (0.92, 0.99)                                                  | 0.49 (0.13, 0.96)                                                   |
| <b>Any dyslipidemia outcome</b>                                                                                                                                                                                                                                                                                                                                                                                                    | 1.29 (1.26, 1.31)              | 258.34 (253.53, 263.24)                                  | 207.43 (206.97, 207.90)                                            | 50.91 (46.09, 55.81)                                                |
| <p>*. Outcomes were ascertained from day 30 after the initial positive COVID-19 test result until end of follow up<br/> †. Adjustment through inverse probability weighting using predefined and algorithmically selected high-dimensional variables. Burdens were computed based on the estimated survival probability at 12 month.<br/> CI, confidence interval; LDL, low-density lipoprotein HDL, high-density lipoprotein.</p> |                                |                                                          |                                                                    |                                                                     |



**Appendix Table 12. Risks and 12-month burdens of post-acute COVID-19 abnormal lipid lab and BMI increased outcomes compared to historical control**

| Outcome*                 | Hazard Ratio (95% CI) <sup>†</sup> | COVID-19 burden per 1000 persons at 12 months (95% CI) <sup>†</sup> | Historical control burden per 1000 persons at 12 months (95% CI) <sup>†</sup> | Absolute burden difference per 1000 persons at 12 months (95% CI) <sup>†</sup> |
|--------------------------|------------------------------------|---------------------------------------------------------------------|-------------------------------------------------------------------------------|--------------------------------------------------------------------------------|
|                          | COVID-19 vs Historical control     |                                                                     |                                                                               |                                                                                |
| <b>Total cholesterol</b> |                                    |                                                                     |                                                                               |                                                                                |
| >210 mg/dL               | 1.37 (1.32, 1.42)                  | 82.99 (80.2, 85.87)                                                 | 61.45 (61.17, 61.72)                                                          | 21.54 (18.75, 24.42)                                                           |
| >220 mg/dL               | 1.40 (1.34, 1.46)                  | 59.16 (56.77, 61.64)                                                | 42.67 (42.44, 42.91)                                                          | 16.48 (14.09, 18.97)                                                           |
| >230 mg/dL               | 1.43 (1.36, 1.50)                  | 41.75 (39.74, 43.85)                                                | 29.4 (29.2, 29.59)                                                            | 12.35 (10.35, 14.46)                                                           |
| <b>Triglycerides</b>     |                                    |                                                                     |                                                                               |                                                                                |
| >160 mg/dL               | 1.28 (1.24, 1.32)                  | 93.27 (90.34, 96.29)                                                | 73.68 (73.38, 73.97)                                                          | 19.6 (16.66, 22.62)                                                            |
| >170 mg/dL               | 1.29 (1.24, 1.34)                  | 81.71 (78.97, 84.55)                                                | 63.98 (63.7, 64.26)                                                           | 17.74 (14.99, 20.57)                                                           |
| >180 mg/dL               | 1.31 (1.26, 1.36)                  | 72.53 (69.93, 75.23)                                                | 55.97 (55.7, 56.23)                                                           | 16.57 (13.96, 19.27)                                                           |
| <b>LDL</b>               |                                    |                                                                     |                                                                               |                                                                                |
| >140 mg/dL               | 1.35 (1.30, 1.41)                  | 64.29 (61.84, 66.84)                                                | 48 (47.76, 48.25)                                                             | 16.29 (13.84, 18.84)                                                           |
| >150 mg/dL               | 1.37 (1.31, 1.44)                  | 42.59 (40.59, 44.69)                                                | 31.21 (31.01, 31.41)                                                          | 11.39 (9.38, 13.48)                                                            |
| >160 mg/dL               | 1.39 (1.31, 1.48)                  | 27.77 (26.14, 29.51)                                                | 20.05 (19.89, 20.21)                                                          | 7.72 (6.08, 9.46)                                                              |
| <b>HDL</b>               |                                    |                                                                     |                                                                               |                                                                                |
| <35 mg/dL                | 1.28 (1.22, 1.34)                  | 43.13 (41.08, 45.27)                                                | 33.91 (33.7, 34.12)                                                           | 9.22 (7.17, 11.36)                                                             |
| <30 mg/dL                | 1.18 (1.09, 1.29)                  | 13.13 (12.05, 14.31)                                                | 11.1 (10.98, 11.22)                                                           | 2.03 (0.95, 3.21)                                                              |
| <25 mg/dL                | 1.14 (0.95, 1.38)                  | 3.01 (2.50, 3.62)                                                   | 2.63 (2.57, 2.69)                                                             | 0.38 (-0.13, 0.99)                                                             |
| <b>BMI</b>               |                                    |                                                                     |                                                                               |                                                                                |
| Increased >3%            | 1.07 (1.04, 1.10)                  | 354.12 (347.07, 361.26)                                             | 335.79 (334.89, 336.69)                                                       | 18.33 (11.28, 25.47)                                                           |
| Increased >5%            | 1.13 (1.10, 1.17)                  | 254.06 (247.72, 260.54)                                             | 228.06 (227.25, 228.86)                                                       | 26.01 (19.66, 32.49)                                                           |
| Increased >10%           | 1.22 (1.16, 1.27)                  | 115.48 (110.79, 120.34)                                             | 95.98 (95.43, 96.53)                                                          | 19.50 (14.82, 24.36)                                                           |

\*. Outcomes were ascertained from day 30 after the initial positive COVID-19 test result until end of follow up  
†. Adjustment through inverse probability weighting using predefined and algorithmically selected high-dimensional variables. Burdens were computed based on the estimated survival probability at 12 month.  
CI, confidence interval; LDL, low-density lipoprotein; HDL, high-density lipoprotein.

Appendix Table 13. Subgroup analyses of the risks of incident post-acute COVID-19 composite dyslipidemia outcomes compared to historical control

| Risk Factors   | Hazard ratio (95% CI) <sup>†</sup> - COVID-19 vs Historical control |                                        |                          |
|----------------|---------------------------------------------------------------------|----------------------------------------|--------------------------|
|                | Abnormal lipid lab results                                          | Lipid-lowering medication prescription | Any dyslipidemia outcome |
| <b>Age</b>     |                                                                     |                                        |                          |
| ≤65            | 1.35<br>(1.25, 1.46)                                                | 1.70<br>(1.51, 1.92)                   | 1.41<br>(1.31, 1.52)     |
| >65            | 1.22<br>(1.19, 1.26)                                                | 1.22<br>(1.13, 1.32)                   | 1.23<br>(1.19, 1.26)     |
| <b>Race</b>    |                                                                     |                                        |                          |
| White          | 1.31<br>(1.28, 1.34)                                                | 1.56<br>(1.49, 1.64)                   | 1.35<br>(1.32, 1.38)     |
| Black          | 1.28<br>(1.21, 1.35)                                                | 1.56<br>(1.42, 1.71)                   | 1.34<br>(1.27, 1.41)     |
| <b>Sex</b>     |                                                                     |                                        |                          |
| Male           | 1.33<br>(1.30, 1.36)                                                | 1.58<br>(1.52, 1.65)                   | 1.38<br>(1.35, 1.41)     |
| Female         | 1.18<br>(1.10, 1.26)                                                | 1.24<br>(1.06, 1.44)                   | 1.17<br>(1.10, 1.25)     |
| <b>Obesity</b> |                                                                     |                                        |                          |
| No             | 1.38<br>(1.34, 1.42)                                                | 1.61<br>(1.52, 1.69)                   | 1.42<br>(1.38, 1.46)     |
| Yes            | 1.23<br>(1.19, 1.27)                                                | 1.53<br>(1.44, 1.63)                   | 1.28<br>(1.24, 1.32)     |
| <b>Smoking</b> |                                                                     |                                        |                          |
| No/former      | 1.36<br>(1.32, 1.39)                                                | 1.60<br>(1.54, 1.67)                   | 1.39<br>(1.36, 1.42)     |
| Yes            | 1.22<br>(1.15, 1.30)                                                | 1.61<br>(1.44, 1.79)                   | 1.30<br>(1.22, 1.38)     |

| Risk Factors                               | Hazard ratio<br>(95% CI) <sup>†</sup> - COVID-19 vs Historical control |                                              |                        |
|--------------------------------------------|------------------------------------------------------------------------|----------------------------------------------|------------------------|
|                                            | Abnormal lipid<br>lab results                                          | Lipid-lowering<br>medication<br>prescription | Coagulation<br>studies |
| <b>Cardiovascular disease</b>              |                                                                        |                                              |                        |
| No                                         | 1.30<br>(1.27, 1.33)                                                   | 1.58<br>(1.52, 1.64)                         | 1.35<br>(1.32, 1.38)   |
| Yes                                        | 1.19<br>(1.07, 1.32)                                                   | 1.82<br>(1.60, 2.07)                         | 1.33<br>(1.21, 1.46)   |
| <b>Chronic kidney disease</b>              |                                                                        |                                              |                        |
| No                                         | 1.30<br>(1.27, 1.33)                                                   | 1.55<br>(1.48, 1.62)                         | 1.34<br>(1.31, 1.37)   |
| Yes                                        | 1.18<br>(1.10, 1.27)                                                   | 1.77<br>(1.59, 1.96)                         | 1.30<br>(1.21, 1.39)   |
| <b>Diabetes</b>                            |                                                                        |                                              |                        |
| No                                         | 1.31<br>(1.28, 1.34)                                                   | 1.61<br>(1.54, 1.68)                         | 1.35<br>(1.33, 1.38)   |
| Yes                                        | 1.27<br>(1.16, 1.40)                                                   | 1.50<br>(1.33, 1.70)                         | 1.33<br>(1.22, 1.45)   |
| <b>Hypertension</b>                        |                                                                        |                                              |                        |
| No                                         | 1.35<br>(1.29, 1.42)                                                   | 1.71<br>(1.59, 1.83)                         | 1.42<br>(1.36, 1.48)   |
| Yes                                        | 1.30<br>(1.27, 1.33)                                                   | 1.55<br>(1.47, 1.62)                         | 1.34<br>(1.31, 1.37)   |
| <b>Dyslipidemia risk score<sup>§</sup></b> |                                                                        |                                              |                        |
| Quartile 1                                 | 1.26<br>(1.20, 1.32)                                                   | 1.75<br>(1.60, 1.91)                         | 1.34<br>(1.28, 1.40)   |
| Quartile 2                                 | 1.28<br>(1.21, 1.36)                                                   | 1.68<br>(1.49, 1.90)                         | 1.36<br>(1.29, 1.45)   |
| Quartile 3                                 | 1.24<br>(1.16, 1.34)                                                   | 1.67<br>(1.49, 1.88)                         | 1.35<br>(1.26, 1.45)   |
| Quartile 4                                 | 1.28<br>(1.19, 1.38)                                                   | 1.35<br>(1.22, 1.50)                         | 1.28<br>(1.20, 1.38)   |

\*. Adjustment through inverse probability weighting using predefined and algorithmically selected high-dimensional variables.

†. Obesity was defined based on baseline BMI>30kg/m<sup>2</sup>

‡. Chronic kidney disease was defined based on baseline outpatient estimated Glomerular Filtration Rate< 60 mL/min/1.73 m<sup>2</sup>

§. Dyslipidemia risk score as probability of having incident lipid-lowering medication use or abnormal lipid labs within 12 months based on age, race, sex, body mass index, cardiovascular disease, cerebrovascular disease, diabetes, and hypertension.

CI, confidence interval.

**Appendix Table 14. Risks and 12-month burdens of post-acute COVID-19 dyslipidemia outcomes by care setting of the acute infection compared to historical control**

| Outcome*                                      | Care setting†              | Hazard ratio (95% CI)‡         | COVID-19 burden per 1000 persons at 12 months (95% CI)‡ | Historical control burden per 1000 persons at 12 months (95% CI)‡ | Burden difference per 1000 persons at 12 months (95% CI)‡ |
|-----------------------------------------------|----------------------------|--------------------------------|---------------------------------------------------------|-------------------------------------------------------------------|-----------------------------------------------------------|
|                                               |                            | COVID-19 vs Historical control |                                                         |                                                                   |                                                           |
| <b>Abnormal lipid lab results</b>             | Non-hospitalized           | 1.27 (1.25, 1.30)              | 231.46 (227.02, 235.97)                                 | 186.56<br>(186.12, 187.01)                                        | 44.89 (40.47, 49.39)                                      |
|                                               | Hospitalized               | 1.52 (1.38, 1.67)              | 269.32 (248.10, 291.98)                                 |                                                                   | 82.75 (61.53, 105.42)                                     |
|                                               | Admitted to intensive care | 1.91 (1.60, 2.27)              | 325.34 (281.70, 373.80)                                 |                                                                   | 138.77 (95.13, 187.24)                                    |
| Total cholesterol>200 mg/dL                   | Non-hospitalized           | 1.37 (1.33, 1.42)              | 122.30 (118.95, 125.73)                                 | 90.56<br>(90.24, 90.89)                                           | 31.73 (28.39, 35.15)                                      |
|                                               | Hospitalized               | 1.70 (1.49, 1.94)              | 149.27 (132.00, 168.56)                                 |                                                                   | 58.70 (41.43, 78.00)                                      |
|                                               | Admitted to intensive care | 1.65 (1.28, 2.12)              | 144.71 (114.34, 182.27)                                 |                                                                   | 54.14 (23.78, 91.70)                                      |
| Triglycerides>150 mg/dL                       | Non-hospitalized           | 1.29 (1.25, 1.33)              | 112.79 (109.57, 116.10)                                 | 88.35<br>(88.03, 88.68)                                           | 24.44 (21.23, 27.73)                                      |
|                                               | Hospitalized               | 1.67 (1.46, 1.90)              | 142.75 (126.54, 160.84)                                 |                                                                   | 54.39 (38.18, 72.48)                                      |
|                                               | Admitted to intensive care | 2.20 (1.77, 2.74)              | 184.23 (150.95, 223.83)                                 |                                                                   | 95.88 (62.60, 135.49)                                     |
| LDL>130 mg/dL                                 | Non-hospitalized           | 1.37 (1.33, 1.42)              | 101.68 (98.63, 104.83)                                  | 75.24<br>(74.94, 75.55)                                           | 26.44 (23.39, 29.57)                                      |
|                                               | Hospitalized               | 1.76 (1.52, 2.03)              | 128.42 (112.26, 146.71)                                 |                                                                   | 53.17 (37.01, 71.46)                                      |
|                                               | Admitted to intensive care | 1.62 (1.23, 2.13)              | 119.25 (92.04, 153.79)                                  |                                                                   | 44.00 (16.79, 78.56)                                      |
| HDL<40 mg/dL                                  | Non-hospitalized           | 1.22 (1.18, 1.26)              | 97.35 (94.35, 100.44)                                   | 80.28<br>(79.97, 80.59)                                           | 17.07 (14.08, 20.15)                                      |
|                                               | Hospitalized               | 1.68 (1.47, 1.92)              | 131.14 (115.89, 148.22)                                 |                                                                   | 50.86 (35.62, 67.94)                                      |
|                                               | Admitted to intensive care | 2.10 (1.66, 2.66)              | 161.17 (129.73, 199.32)                                 |                                                                   | 80.89 (49.44, 119.05)                                     |
| <b>Lipid-lowering medication prescription</b> | Non-hospitalized           | 1.37 (1.32, 1.43)              | 70.54 (67.70, 73.50)                                    | 51.86<br>(51.60, 52.11)                                           | 18.69 (15.94, 21.55)                                      |
|                                               | Hospitalized               | 3.42 (3.01, 3.89)              | 166.55 (148.14, 187.00)                                 |                                                                   | 114.70 (96.37, 135.03)                                    |
|                                               | Admitted to intensive care | 4.58 (3.71, 5.64)              | 216.24 (179.41, 259.37)                                 |                                                                   | 164.39 (127.43, 207.68)                                   |
| Statins                                       | Non-hospitalized           | 1.38 (1.32, 1.44)              | 68.75 (65.92, 71.68)                                    | 50.33<br>(50.08, 50.58)                                           | 18.41 (15.68, 21.25)                                      |
|                                               | Hospitalized               | 3.30 (2.90, 3.75)              | 156.61 (139.00, 176.21)                                 |                                                                   | 106.27 (88.75, 125.77)                                    |
|                                               | Admitted to intensive care | 4.64 (3.76, 5.73)              | 212.95 (176.30, 255.97)                                 |                                                                   | 162.62 (125.84, 205.81)                                   |
| Bile acid resins                              | Non-hospitalized           | 1.28 (0.99, 1.65)              | 1.35 (1.04, 1.75)                                       | 1.06<br>(1.02, 1.10)                                              | 0.29 (-0.01, 0.69)                                        |
|                                               | Hospitalized               | 7.73 (3.48, 17.21)             | 8.15 (3.67, 18.04)                                      |                                                                   | 7.09 (2.60, 17.03)                                        |
|                                               | Admitted to intensive care | 2.43 (0.61, 9.72)              | 2.57 (0.64, 10.23)                                      |                                                                   | 1.51 (-0.42, 9.19)                                        |
| Fibrates                                      | Non-hospitalized           | 1.32 (0.99, 1.77)              | 1.21 (0.90, 1.62)                                       | 0.91<br>(0.88, 0.95)                                              | 0.29 (-0.01, 0.69)                                        |
|                                               | Hospitalized               | 3.39 (1.38, 8.31)              | 3.10 (1.27, 7.57)                                       |                                                                   | 2.18 (0.38, 6.50)                                         |
|                                               | Admitted to intensive care | 2.39 (0.80, 7.13)              | 2.18 (0.73, 6.50)                                       |                                                                   | 1.27 (-0.19, 5.66)                                        |

| Outcome*                 | Care setting†              | Hazard ratio (95% CI)‡         | COVID-19 burden per 1000 persons at 12 months (95% CI)‡ | Historical control burden per 1000 persons at 12 months (95% CI)‡ | Burden difference per 1000 persons at 12 months (95% CI)‡ |
|--------------------------|----------------------------|--------------------------------|---------------------------------------------------------|-------------------------------------------------------------------|-----------------------------------------------------------|
|                          |                            | COVID-19 vs Historical control |                                                         |                                                                   |                                                           |
| Any dyslipidemia outcome | Non-hospitalized           | 1.28 (1.26, 1.31)              | 260.15 (255.50, 264.87)                                 | 209.21<br>(208.74, 209.68)                                        | 50.94 (46.30, 55.65)                                      |
|                          | Hospitalized               | 1.89 (1.73, 2.06)              | 358.18 (334.31, 383.22)                                 |                                                                   | 148.97 (125.10, 174.01)                                   |
|                          | Admitted to intensive care | 2.47 (2.11, 2.89)              | 440.27 (391.05, 492.83)                                 |                                                                   | 231.06 (181.84, 283.62)                                   |

\*. Outcomes were ascertained from day 30 after the initial positive COVID-19 test result until end of follow up.  
†. Based on care received within the first 30 days after a positive COVID-19 test result.  
‡. Adjustment through inverse probability weighting using predefined variables and algorithmically selected high-dimensional variables. Burdens were computed based on the estimated survival probability at 12 month.  
CI, confidence interval; PCSK9, proprotein convertase subtilisin/kexin type 9; LDL, low-density lipoprotein HDL, high-density lipoprotein.

**Appendix Table 15. Sensitivity analysis for any dyslipidemia outcome compared to contemporary and historical controls**

| Analysis                                                        | Abnormal lipid lab result<br>Hazard ratio (95% CI)* |                      | Lipid-lowering medication<br>prescription<br>Hazard ratio (95% CI)* |                      | Any dyslipidemia outcome<br>Hazard ratio (95% CI)* |                      |
|-----------------------------------------------------------------|-----------------------------------------------------|----------------------|---------------------------------------------------------------------|----------------------|----------------------------------------------------|----------------------|
|                                                                 | Contemporary                                        | Historical           | Contemporary                                                        | Historical           | Contemporary                                       | Historical           |
| Used 300 algorithmically selected<br>high dimensional variables | 1.24<br>(1.21, 1.27)                                | 1.23<br>(1.20, 1.26) | 1.52<br>(1.46, 1.59)                                                | 1.48<br>(1.42, 1.55) | 1.30<br>(1.27, 1.33)                               | 1.28<br>(1.25, 1.31) |
| Did not use any high dimensional<br>variables                   | 1.31<br>(1.28, 1.33)                                | 1.31<br>(1.28, 1.34) | 1.60<br>(1.54, 1.66)                                                | 1.58<br>(1.52, 1.64) | 1.37<br>(1.34, 1.40)                               | 1.36<br>(1.33, 1.38) |
| Doubly robust                                                   | 1.25<br>(1.22, 1.27)                                | 1.23<br>(1.21, 1.26) | 1.25<br>(1.22, 1.27)                                                | 1.23<br>(1.21, 1.26) | 1.25<br>(1.22, 1.27)                               | 1.23<br>(1.21, 1.26) |

\*. Outcomes were ascertained from day 30 after the initial positive COVID-19 test result until end of follow up.  
CI, confidence interval.

**Appendix Table 16. Sensitivity analysis for any dyslipidemia outcome by care setting of the acute infection compared to contemporary and historical controls**

| Analysis                                                              | Care Setting†                 | Abnormal lipid lab result<br>Hazard ratio (95% CI)* |                      | Lipid-lowering medication<br>prescription<br>Hazard ratio (95% CI)* |                      | Any dyslipidemia outcome<br>Hazard ratio (95% CI)* |                      |
|-----------------------------------------------------------------------|-------------------------------|-----------------------------------------------------|----------------------|---------------------------------------------------------------------|----------------------|----------------------------------------------------|----------------------|
|                                                                       |                               | Contemporary                                        | Historical           | Contemporary                                                        | Historical           | Contemporary                                       | Historical           |
| Used 300<br>algorithmically selected<br>high dimensional<br>variables | Non-hospitalized              | 1.28<br>(1.25, 1.31)                                | 1.27<br>(1.25, 1.30) | 1.41<br>(1.35, 1.47)                                                | 1.37<br>(1.31, 1.43) | 1.31<br>(1.28, 1.33)                               | 1.28<br>(1.26, 1.31) |
|                                                                       | Hospitalized                  | 1.52<br>(1.39, 1.68)                                | 1.52<br>(1.38, 1.67) | 3.50<br>(3.09, 3.98)                                                | 3.40<br>(3.00, 3.87) | 1.92<br>(1.76, 2.09)                               | 1.89<br>(1.73, 2.06) |
|                                                                       | Admitted to<br>intensive care | 1.91<br>(1.61, 2.27)                                | 1.91<br>(1.60, 2.27) | 4.69<br>(3.80, 5.78)                                                | 4.55<br>(3.69, 5.61) | 2.52<br>(2.15, 2.94)                               | 2.47<br>(2.11, 2.89) |
| Did not use any high<br>dimensional variables                         | Non-hospitalized              | 1.28<br>(1.25, 1.31)                                | 1.29<br>(1.26, 1.31) | 1.41<br>(1.35, 1.47)                                                | 1.39<br>(1.33, 1.45) | 1.31<br>(1.28, 1.34)                               | 1.30<br>(1.27, 1.32) |
|                                                                       | Hospitalized                  | 1.53<br>(1.39, 1.68)                                | 1.53<br>(1.39, 1.69) | 3.51<br>(3.09, 3.98)                                                | 3.46<br>(3.05, 3.93) | 1.92<br>(1.77, 2.10)                               | 1.91<br>(1.75, 2.08) |
|                                                                       | Admitted to<br>intensive care | 1.91<br>(1.61, 2.28)                                | 1.92<br>(1.62, 2.29) | 4.69<br>(3.80, 5.79)                                                | 4.63<br>(3.76, 5.70) | 2.52<br>(2.15, 2.95)                               | 2.49<br>(2.13, 2.92) |
| Doubly robust                                                         | Non-hospitalized              | 1.26<br>(1.24, 1.29)                                | 1.26<br>(1.24, 1.29) | 1.42<br>(1.36, 1.48)                                                | 1.41<br>(1.34, 1.47) | 1.30<br>(1.27, 1.33)                               | 1.29<br>(1.26, 1.31) |
|                                                                       | Hospitalized                  | 1.44<br>(1.31, 1.58)                                | 1.44<br>(1.31, 1.59) | 3.51<br>(3.08, 4.00)                                                | 3.47<br>(3.04, 3.96) | 1.85<br>(1.70, 2.02)                               | 1.83<br>(1.68, 1.99) |
|                                                                       | Admitted to<br>intensive care | 1.80<br>(1.52, 2.14)                                | 1.81<br>(1.53, 2.14) | 4.83<br>(3.95, 5.90)                                                | 4.77<br>(3.91, 5.82) | 2.46<br>(2.12, 2.86)                               | 2.43<br>(2.09, 2.83) |

\*. Outcomes were ascertained from day 30 after the initial positive COVID-19 test result until end of follow up.

†. Based on care received within the first 30 days after a positive COVID-19 test result.

CI, confidence interval.
